# Supplementary material for: Time trends in STEMI—improved treatment and outcome but still a gender gap: a prospective observational cohort study from the SWEDEHEART register
Source: PubMed Central journal article supplement — BMJ Open. 2012 Mar 27;2(2):e000726. doi: 10.1136/bmjopen-2011-000726 (PMC3323814; doi:10.1136/bmjopen-2011-000726), 2012-03-27
Supplement: bmjopen-2011-000726-s1.pdf [file bmjopen-2011-000726-s1.pdf]

TABLE I Baseline characteristics, management and outcome

|                                                            | Early period: Year 1998-2000 |                    |         | Late period: Year 2004-2006 |                    |         | Periods compared<br>p-value |
|------------------------------------------------------------|------------------------------|--------------------|---------|-----------------------------|--------------------|---------|-----------------------------|
|                                                            | Men<br>(n=10151)             | Women<br>(n=5546)  | p-value | Men<br>(n=9386)             | Women<br>(n=4994)  | p-value |                             |
| Age, in years (standard deviations)                        | 66.4 (12.2)                  | 72.9 (11.5)        | <0.001  | 65.9 (12.2)                 | 72.4 (12.1)        | <0.001  | 0.11                        |
| Median symptom-to-door time, h:m (IQR)                     | 2:45 (1:39 – 5:10)           | 3:15 (1:54 – 6:15) | <0.001  | 3:00 (1:40 – 5:50)          | 3:30 (2:00 – 6:30) | <0.001  | <0.001‡                     |
| Median time from 1 <sup>st</sup> ECG to balloon, h:m (IQR) | 1:00 (0:35 – 1:39)           | 0:58 (0:35 – 1:42) | 0.60    | 1:10 (0:42 – 1:49)          | 1:15 (0:45 – 1:59) | <0.001  | <0.001                      |
| Median time from 1 <sup>st</sup> ECG to needle, h:m (IQR)  | 0:43 (0:27 – 1:05)           | 0:47 (0:30 – 1:15) | <0.001  | 0:36 (0:20 – 1:02)          | 0:41 (0:23 – 1:08) | 0.001   | <0.001                      |
| <b>Co-morbidity</b>                                        |                              |                    |         |                             |                    |         |                             |
| Current smoker                                             | 2762 (28.9)                  | 1220 (23.8)        | <0.001  | 2680 (30.9)                 | 1224 (27.6)        | <0.001  | <0.001‡                     |
| Previous myocardial infarction                             | 1781 (17.5)                  | 742 (13.4)         | <0.001  | 1062 (11.3)                 | 529 (10.6)         | 0.19    | <0.001†                     |
| Previous PCI                                               | 287 (2.9)                    | 87 (1.6)           | <0.001  | 372 (4.0)                   | 110 (2.2)          | <0.001  | <0.001‡                     |
| Previous coronary artery bypass grafting                   | 307 (3.1)                    | 58 (1.1)           | <0.001  | 308 (3.3)                   | 82 (1.7)           | <0.001  | 0.05 ‡                      |
| Diabetes Mellitus                                          | 1758 (17.3)                  | 1198 (21.6)        | <0.001  | 1679 (17.9)                 | 1014 (20.3)        | <0.001  | 0.82                        |
| Hypertension                                               | 2736 (27.2)                  | 1972 (36.0)        | <0.001  | 3053 (32.8)                 | 2195 (44.5)        | <0.001  | <0.001‡                     |
| Congestive heart failure                                   | 586 (5.8)                    | 518 (9.3)          | <0.001  | 406 (4.3)                   | 455 (9.1)          | <0.001  | <0.001†                     |
| Previous stroke                                            | 769 (7.6)                    | 509 (9.2)          | <0.001  | 780 (8.3)                   | 523 (10.5)         | <0.001  | 0.04‡                       |
| Chronic kidney disease                                     | 89 (0.9)                     | 40 (0.7)           | 0.30    | 113 (1.2)                   | 72 (1.4)           | <0.001  | <0.001‡                     |
| Chronic obstructive pulmonary disease                      | 448 (4.4)                    | 358 (6.5)          | <0.001  | 465 (5.0)                   | 440 (8.8)          | <0.001  | <0.001‡                     |
| Cancer within 3 years                                      | 246 (2.4)                    | 160 (2.9)          | 0.08    | 277 (3.0)                   | 149 (3.0)          | 0.91    | 0.05‡                       |
| <b>Therapy on arrival</b>                                  |                              |                    |         |                             |                    |         |                             |
| Aspirin                                                    | 2680 (26.6)                  | 1512 (27.5)        | 0.25    | 2127 (22.9)                 | 1440 (29.2)        | <0.001  | <0.001†                     |
| Other platelet inhibitor                                   | 37 (0.4)                     | 16 (0.3)           | 0.43    | 309 (3.3)                   | 195 (3.9)          | 0.05    | <0.001‡                     |
| Beta-blocker                                               | 2525 (25.1)                  | 1544 (28.1)        | <0.001  | 2194 (23.6)                 | 1565 (31.8)        | <0.001  | 0.57                        |
| ACE inhibitor/ARB                                          | 1081 (10.7)                  | 586 (10.7)         | 0.89    | 1553 (16.7)                 | 924 (18.7)         | 0.002   | <0.001‡                     |
| Statin                                                     | 750 (7.5)                    | 318 (5.8)          | <0.001  | 1249 (13.4)                 | 621 (12.6)         | 0.16    | <0.001‡                     |
| Oral anticoagulant                                         | 271 (2.7)                    | 109 (2.0)          | 0.006   | 232 (2.5)                   | 119 (2.4)          | 0.76    | 0.91                        |
| Calcium-channel blocker                                    | 1304 (13.0)                  | 786 (14.3)         | 0.02    | 1075 (11.6)                 | 722 (14.6)         | <0.001  | 0.04†                       |
| Diuretics                                                  | 1453 (14.4)                  | 1520 (27.7)        | <0.001  | 1182 (12.7)                 | 1407 (28.5)        | <0.001  | 0.04†                       |
| Digitalis                                                  | 388 (3.9)                    | 343 (6.3)          | <0.001  | 156 (1.7)                   | 214 (4.3)          | <0.001  | <0.001†                     |
| Long-acting nitrates                                       | 1053 (10.5)                  | 679 (12.4)         | <0.001  | 487 (5.2)                   | 435 (8.8)          | <0.001  | <0.001†                     |
| <b>CCU procedures and therapies</b>                        |                              |                    |         |                             |                    |         |                             |
| Echocardiography                                           | 6200 (64.2)                  | 2970 (57.8)        | <0.001  | 6842 (73.7)                 | 3282 (66.5)        | <0.001  | <0.001‡                     |
| Coronary angiography                                       | 2539 (25.0)                  | 975 (17.6)         | <0.001  | 7686 (81.9)                 | 3316 (66.4)        | <0.001  | <0.001‡                     |
| Reperfusion therapy, all                                   | 7194 (70.9)                  | 3500 (63.1)        | <0.001  | 7065 (75.3)                 | 3174 (63.6)        | <0.001  | <0.001‡                     |
| Fibrinolysis (% of all patients)                           | 6419 (63.3)                  | 3223 (58.2)        | <0.001  | 1944 (21.0)                 | 1006 (20.4)        | 0.44    | <0.001‡                     |
| Fibrinolysis (% of patients receiving reperfusion therapy) | 6419 (89.3)                  | 3223 (92.2)        | <0.001  | 1944 (28.0)                 | 1006 (32.4)        | <0.001  | <0.001                      |
| Primary PCI (% of all patients)                            | 713 (7.0)                    | 248 (4.5)          | <0.001  | 4898 (52.2)                 | 2033 (40.7)        | <0.001  | <0.001‡                     |
| Primary PCI (% of patients receiving reperfusion therapy)  | 713 (9.9)                    | 248 (7.1)          | <0.001  | 4898 (69.3)                 | 2033 (64.1)        | <0.001  | <0.001                      |
| <b>Complications</b>                                       |                              |                    |         |                             |                    |         |                             |
| Killip class II-IV                                         | 2912 (29.5)                  | 2077 (38.6)        | <0.001  | 991 (11.1)                  | 847 (18.4)         | <0.001  | <0.001                      |
| Major bleeding †                                           | 67 (1.1)                     | 62 (2.0)           | <0.001  | 104 (1.6)                   | 120 (4.0)          | <0.001  | <0.001‡                     |
| Re-infarction during hospital stay                         | 281 (2.9)                    | 205 (3.9)          | 0.001   | 150 (1.6)                   | 94 (1.9)           | 0.21    | <0.001†                     |
| <b>Therapy at discharge in hospital survivors</b>          |                              |                    |         |                             |                    |         |                             |
| Aspirin                                                    | 7994 (87.5)                  | 4004 (86.1)        | 0.02    | 8318 (93.6)                 | 4062 (91.2)        | <0.001  | <0.001‡                     |
| Other platelet inhibitor                                   | 800 (8.8)                    | 330 (7.1)          | 0.001   | 6978 (78.5)                 | 3045 (68.4)        | <0.001  | <0.001‡                     |
| Beta-blocker                                               | 7801 (85.4)                  | 3812 (82.1)        | <0.001  | 8105 (91.2)                 | 3895 (87.5)        | <0.001  | <0.001‡                     |
| ACE inhibitor/ARB                                          | 3934 (43.4)                  | 1952 (42.4)        | 0.25    | 5894 (66.4)                 | 2719 (61.1)        | <0.001  | <0.001‡                     |
| Statin                                                     | 3991 (44.0)                  | 1757 (38.1)        | <0.001  | 7570 (85.2)                 | 3279 (73.8)        | <0.001  | <0.001‡                     |
| <b>Outcome</b>                                             |                              |                    |         |                             |                    |         |                             |
| In-hospital mortality                                      | 837 (8.3)                    | 800 (14.5)         | <0.001  | 464 (4.9)                   | 521 (10.4)         | <0.001  | <0.001†                     |
| One year mortality                                         | 1576 (15.5)                  | 1324 (23.9)        | <0.001  | 961 (10.3)                  | 955 (19.1)         | <0.001  | <0.001†                     |

Data presented as numbers (percentages) if not otherwise indicated. † Intracranial haemorrhage, mortal bleeding or given blood transfusion in patients treated with reperfusion therapy. ‡ More in early period † More in late period  
IQR, interquartile range; PCI, percutaneous coronary intervention; ACE, angiotensin converting enzyme; ARB, angiotensin receptor blocker; CCU, coronary care unit
