# Supplementary material for: Time trends in STEMI—improved treatment and outcome but still a gender gap: a prospective observational cohort study from the SWEDEHEART register
Source: PubMed Central journal article supplement — BMJ Open. 2012 Mar 27;2(2):e000726. doi: 10.1136/bmjopen-2011-000726 (PMC3323814; doi:10.1136/bmjopen-2011-000726), 2012-03-27
Supplement: bmjopen-2011-000726-s2.pdf [file bmjopen-2011-000726-s2.pdf]

Supplementary table. Forest plot data (figure 1 and 2) including sensitivity analyses on the impact of symptom-to-door time regarding use of coronary angiography, reperfusion therapy and in-hospital mortality

| Early period: Year 1998-2000 (n=15697)            |                    |                       |                                                       |                                                       |
|---------------------------------------------------|--------------------|-----------------------|-------------------------------------------------------|-------------------------------------------------------|
|                                                   | Crude<br>OR/HR     | Age adjusted<br>OR/HR | Multivariable adjusted OR/HR<br>1 <sup>st</sup> model | Multivariable adjusted OR/HR<br>2 <sup>nd</sup> model |
| <b>Cardiac procedures</b>                         |                    |                       |                                                       |                                                       |
| Echocardiography                                  | 0.77 (0.72 – 0.82) | 0.94 (0.87 – 1.01)    | 0.94 (0.86 – 1.01)                                    | -                                                     |
| Coronary angiography                              | 0.64 (0.59 – 0.69) | 0.86 (0.79 – 0.94)    | 0.92 (0.83 – 1.01)                                    | 0.9                                                   |
| <b>Therapy at CCU</b>                             |                    |                       |                                                       |                                                       |
| IV Beta-blockers                                  | 0.79 (0.74 – 0.85) | 0.89 (0.83 – 0.96)    | 0.87 (0.81 – 0.94)                                    | -                                                     |
| IV GP IIb/IIIa inhibitor                          | 0.68 (0.60 – 0.78) | 0.85 (0.74 – 0.97)    | 0.89 (0.77 – 1.03)                                    | -                                                     |
| Reperfusion therapy                               | 0.70 (0.66 – 0.75) | 0.87 (0.81 – 0.94)    | 0.84 (0.78 – 0.92)                                    | 0.8                                                   |
| Fibrinolytics                                     | 0.81 (0.75 – 0.86) | 0.92 (0.85 – 0.98)    | 0.89 (0.82 – 0.96)                                    | 0.9                                                   |
| Primary PCI                                       | 0.62 (0.53 – 0.72) | 0.80 (0.68 – 0.93)    | 0.81 (0.68 – 0.96)                                    | 0.7                                                   |
| <b>Therapy at discharge in hospital survivors</b> |                    |                       |                                                       |                                                       |
| Aspirin                                           | 0.89 (0.80 – 0.98) | 0.96 (0.86 – 1.06)    | 0.96 (0.85 – 1.08)                                    | -                                                     |
| Other platelet inhibitor                          | 0.80 (0.70 – 0.91) | 0.98 (0.86 – 1.13)    | 1.01 (0.86 – 1.18)                                    | -                                                     |
| Beta-blocker                                      | 0.78 (0.71 – 0.86) | 0.95 (0.95 – 1.04)    | 0.96 (0.87 – 1.08)                                    | -                                                     |
| ACE inhibitors/ARB                                | 0.96 (0.89 – 1.03) | 0.86 (0.80 – 0.92)    | 0.85 (0.78 – 0.92)                                    | -                                                     |
| Statins                                           | 0.78 (0.73 – 0.84) | 1.12 (1.03 – 1.21)    | 1.16 (1.06 – 1.27)                                    | -                                                     |
| <b>Early and late outcome</b>                     |                    |                       |                                                       |                                                       |
| In-hospital mortality                             | 1.88 (1.70 – 2.09) | 1.19 (1.06 – 1.32)    | 1.12 (0.99 – 1.28)                                    | 1.1                                                   |
| 1-year mortality*                                 | 1.63 (1.51 – 1.75) | 1.05 (0.98 – 1.14)    | 1.05 (0.97 – 1.14)                                    | 0.9                                                   |

Data from logistic regression analyses (\*Cox regression analyses) presented as odds ratios (\* hazard ratios) with 95% confidence intervals. 1<sup>st</sup> model included sex, age, smoking, previous myocardial infarction, previous revascularization, other co-morbidities. 2<sup>nd</sup> model included sex, age, smoking, previous myocardial infarction, previous revascularization, other co-morbidities and evidenced based therapies at discharge were added. OR, Odds Ratio; HR, Hazard Ratio; CCU, Coronary Care Unit; IV, intravenously; GP, glycoprotein; PCI, Percutaneous Coronary Intervention; ACE, angiotensin converting enzyme; ARB, angiotensin receptor blocker.
