# Supplementary material for: Time trends in STEMI—improved treatment and outcome but still a gender gap: a prospective observational cohort study from the SWEDEHEART register
Source: PubMed Central journal article supplement — BMJ Open. 2012 Mar 27;2(2):e000726. doi: 10.1136/bmjopen-2011-000726 (PMC3323814; doi:10.1136/bmjopen-2011-000726), 2012-03-27
Supplement: bmjopen-2011-000726-s4.pdf [file bmjopen-2011-000726-s4.pdf]

## Figure legends

Figure 1. Trends in reperfusion therapy among Swedish STEMI patients 1995 – 2006

Figure 2. Use of coronary angiography, reperfusion therapy and evidence based therapies at discharge in STEMI patients in two time periods after multivariable adjustments, women vs. men

Figure 3. In-hospital and cumulative one year mortality in STEMI patients in two time periods with different dominating reperfusion strategies after multivariable adjustments, women vs. men
