# Supplementary material for: Time trends in STEMI—improved treatment and outcome but still a gender gap: a prospective observational cohort study from the SWEDEHEART register
Source: PubMed Central journal article supplement — BMJ Open. 2012 Mar 27;2(2):e000726. doi: 10.1136/bmjopen-2011-000726 (PMC3323814; doi:10.1136/bmjopen-2011-000726), 2012-03-27
Supplement: bmjopen-2011-000726.draft_revisions.pdf [file bmjopen-2011-000726.draft_revisions.pdf]

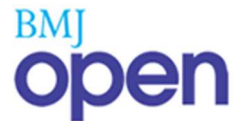

**Time trends in STEMI - improved treatment and outcome  
but still a gender gap:  
A prospective, observational cohort study from the  
SWEDEHEART register**

|                                 |                                                                                                                                                                                                                                                                                                                                                                                                                  |
|---------------------------------|------------------------------------------------------------------------------------------------------------------------------------------------------------------------------------------------------------------------------------------------------------------------------------------------------------------------------------------------------------------------------------------------------------------|
| Journal:                        | <i>BMJ Open</i>                                                                                                                                                                                                                                                                                                                                                                                                  |
| Manuscript ID:                  | bmjopen-2011-000726                                                                                                                                                                                                                                                                                                                                                                                              |
| Article Type:                   | Research                                                                                                                                                                                                                                                                                                                                                                                                         |
| Date Submitted by the Author:   | 07-Dec-2011                                                                                                                                                                                                                                                                                                                                                                                                      |
| Complete List of Authors:       | Sederholm Lawesson, Sofia; Department of Medical and Health Sciences, Division of Cardiovascular Medicine;<br>Alfredsson, Joakim; Department of Medical and Health Sciences, Division of Cardiovascular Medicine<br>Fredrikson, Mats; Department of Clinical and Experimental Medicine, Faculty of Health Sciences<br>Swahn, Eva; Department of Medical and Health Sciences, Division of Cardiovascular Medicine |
| <b>Primary Subject Heading</b>: | Cardiovascular medicine                                                                                                                                                                                                                                                                                                                                                                                          |
| Secondary Subject Heading:      | Cardiovascular medicine                                                                                                                                                                                                                                                                                                                                                                                          |
| Keywords:                       | Coronary heart disease < CARDIOLOGY, Ischaemic heart disease < CARDIOLOGY, Myocardial infarction < CARDIOLOGY                                                                                                                                                                                                                                                                                                    |
|                                 |                                                                                                                                                                                                                                                                                                                                                                                                                  |

SCHOLARONE™  
Manuscripts

only

**Time trends in STEMI - improved treatment and outcome but still a gender gap****A prospective, observational cohort study from the SWEDEHEART register**

Sofia Sederholm Lawesson, MD\*, Joakim Alfredsson, MD, PhD\*, Mats Fredrikson, PhD\*\*, Eva Swahn,  
MD PhD, FESC, FACC\*

\*Department of Medical and Health Sciences, Division of Cardiovascular Medicine, Linköping University  
Hospital, Linköping, Sweden.

\*\* Department of Clinical and Experimental Medicine, Faculty of Health Sciences, Linköping University,  
Linköping, Sweden.

**Address for correspondence**

Sofia Sederholm Lawesson, M.D.

Department of Medical and Health Sciences, Division of Cardiovascular Medicine

Linköping University Hospital

SE-581 85 Linköping

SWEDEN

Telephone: +4610103000

Fax: +46101032171

Email: [sofia.sederholm.lavesson@lio.se](mailto:sofia.sederholm.lavesson@lio.se), [sofia.lawesson@liu.se](mailto:sofia.lawesson@liu.se)

**Keywords:** ST-elevation myocardial infarction, sex factors, reperfusion therapy, mortality, evidence-based  
medicine

**Word count:** 2999 (Manuscript only. Title page, summary, contributorship statement, table and references  
not included in word count)

**Data sharing statement:** There is no additional data available

**Contributorship statement:**

1  
2 Sofia Sederholm Lawesson has substantially contributed to conception and design of the study. She has  
3 handled, analysed and interpreted all the data and drafted the article.  
4

5 Joakim Alfredsson has substantially contributed to conception and design, help with analyses and  
6 interpretation of the data. He has revised the draft critically for important intellectual content and approved  
7 the final version to be published.  
8

9  
10 Mats Fredrikson has substantially contributed with analysing and interpreting the data, revising the draft  
11 critically and approved the final version to be published.  
12

13 Eva Swahn has substantially contributed to conception and design, help with analysing and interpreting the  
14 data. She revised the draft critically for important intellectual content and approved the final version to be  
15 published.  
16  
17  
18  
19  
20  
21  
22  
23  
24  
25  
26  
27  
28  
29  
30  
31  
32  
33  
34  
35  
36  
37  
38  
39  
40  
41  
42  
43  
44  
45  
46  
47  
48  
49  
50  
51  
52  
53  
54  
55  
56  
57  
58  
59  
60

## Summary

### *Article focus:*

With 1) the focus on treatment guidelines, 2) the attention on gender differences in management and outcome and 3) the change in reperfusion strategy in STEMI the last decade, we hypothesised;

- That gender differences in adherence to treatment guidelines would have diminished
- That gender differences in outcome would have decreased

### *Key messages:*

- Management improved and mortality decreased in STEMI patients in the late compared to the early period.
- The gender treatment gap did not decrease between the two time periods.
- The gender outcome gap did not decrease between the two time periods.

### *Strengths and limitations:*

The study included a huge amount of STEMI patients, with enough numbers to assure adequate statistical analyses. SWEDEHEART registry is a unique Swedish National Quality registry, with quality control and audit measures, covering all hospitals in Sweden treating STEMI patients and has standardised criteria for defining MI. Mortality data are complete as the vital status of all Swedish citizens is registered in the Cause of Death Registry. One limitation is the nonrandomised, observational nature. Thus multivariate analyses were used in order to reduce the bias inherent in this type of studies. Adjustments might be influenced by the lack of registration on some possible confounding factors in the data base e.g. non-cardiac co-morbidities and contra-indications for specific treatments.

## Abstract

Objective: In ST-elevation myocardial infarction [STEMI] women received less evidence-based medicine [EBM] and had worse outcome during the fibrinolytic era. With the shift to primary percutaneous coronary intervention [pPCI] as preferred reperfusion strategy, we aimed to investigate whether these gender differences has diminished.

Design, setting and patients: Cohort study including consecutive STEMI patients registered 1998 – 2000 (n=15697) and 2004 – 2006 (n=14380) in the Register of Information and Knowledge about Swedish Heart Intensive care Admissions.

Main outcome measures: EBM use, in-hospital and one year mortality.

Results: Reperfusion therapy (pPCI in 9 vs. 68%, early vs. late period) was given to 63 vs. 71% and 64 vs. 75%, women vs. men in the two respective periods, OR 0.86 (95% CI 0.78 – 0.94) and 0.80 (0.73 – 0.89) after multivariable adjustments. In the late period women had 14 – 25% less chance of receiving EBM at discharge (OR 0.75, 95% CI 0.68 – 0.81 thru 0.86, 0.77 – 0.95). Gender differences in the early period were small. In both periods, multivariable adjusted in-hospital mortality was higher in women, OR 1.17 (95% CI 1.02 – 1.14) and 1.21 (1.00 – 1.46). One year mortality was gender equal, HR 0.95 (95% CI 0.87– 1.05) and 0.96 (0.86 – 1.08), after adding EBM to the multivariable adjustments.

Conclusion: In spite of an intense gender debate, focus on guideline adherence and the change in reperfusion strategy the last decade gender differences in use of reperfusion therapy and evidence-based therapy at discharge did not decline during the study period. Moreover, higher mortality in women persisted.

## INTRODUCTION

Numerous studies have shown excess mortality in women after myocardial infarction [MI][1, 2] but ST-elevation MI [STEMI] has seldom been separated from non-ST elevation acute coronary syndromes [NSTEACS].[1, 3] Women have been treated less intensively than men [4, 5] with less reperfusion therapy in the STEMI group.[5] Whereas some have found small gender differences in treatment not affecting mortality after MI [3] others have attributed part of the gender gap in outcome to a treatment bias.[1] Higher risk of death and bleeding in women is shown in many fibrinolytic trials. [2, 6] There is less firm evidence that female gender is an independent risk factor for adverse outcome after primary percutaneous coronary intervention [pPCI] which seems to be a better reperfusion strategy for women in particular.[7, 8, 9, 10] Since 2002/2003 there are separate ESC guidelines for STEMI and NSTEMI ACS recommending pPCI as the preferred reperfusion strategy in STEMI.[11, 12] With the last decade's awareness and debate about ACS from a gender perspective, the focus on adherence to treatment guidelines, and the shift to a reperfusion strategy, we hypothesised that the previously noticed gender differences in STEMI management would have decreased and thus also the gender gap in mortality, especially in the early phase.

1 Our aim was to evaluate gender differences in management and outcome in STEMI patients in two time  
2 periods with different dominating reperfusion strategies, i.e. fibrinolytics and primary PCI, respectively.  
3  
4  
5

## 6 **METHODS**

### 7 **Patients**

8  
9  
10 Data for this study came from the prospective observational Register of Information and Knowledge about  
11 Swedish Heart Intensive care Admissions [RIKS-HIA], since 2009 merged with the Swedish Coronary  
12 Angiography and Angioplasty Registry [SCAAR], the Swedish Heart Surgery Registry and the National  
13 Registry of Secondary Prevention [SEPHIA] together forming the Swedish Web-system for Enhancement  
14 and Development of Evidence-based care in Heart disease Evaluated According to Recommended Therapies  
15 [SWEDEHEART].[13] RIKS-HIA contains information about all patients admitted to coronary care units  
16 [CCU] of the participating hospitals in Sweden (95% of the CCUs in Sweden year 2004). Variables  
17 including age, sex, smoking habits, co-morbidity, delay-times, symptoms, biochemical markers, results from  
18 cardiac investigations, complications, revascularisation procedures, therapies, discharge diagnoses and  
19 outcomes during the hospital stay are continuously recorded on-line over the internet. The criteria for the MI  
20 diagnosis were standardised and identical for all participating hospitals.[14, 15] The RIKS-HIA register has  
21 a continuous internal and external validation of data. The internet-based program for data input has  
22 interactive instructions, manuals, definitions and help functions and a number of compulsory variables and  
23 inbuilt validity controls. An independent monitor travels to 20 hospitals annually and in each hospital  
24 randomly chosen patients in the database are compared with the hospital records. For example year 2005,  
25 95.2% and 2006, 96.5% of the registry input showed agreement with the hospital records.  
26  
27  
28  
29  
30  
31  
32  
33  
34  
35  
36  
37  
38  
39  
40  
41  
42  
43  
44  
45  
46

47 From the National Cause of Death Register information was available about cause of death and vital status  
48 of all Swedish citizens until 31<sup>st</sup> of December 2007. Regarding co-morbidity, data on previous diagnoses of  
49 diabetes, hypertension, MI and previous revascularisation procedures were taken from RIKS-HIA, SCAAR  
50 and the Swedish Heart Surgery Registry, which were merged. Previous history of co-morbidities such as  
51 chronic obstructive pulmonary disease [COPD], heart failure, chronic kidney disease [CKD], peripheral  
52  
53  
54  
55  
56  
57  
58  
59  
60

1 artery disease [PAD], dementia and cancer was obtained from the National Patient Register, including  
2 patients hospitalised in Sweden since 1987. Information on previous history of heart failure or stroke was  
3 taken both from RIKSHIA and the National Patient Register. A patient was coded as having the diagnosis if  
4 he/she had the diagnosis in either of these registries.  
5  
6

7  
8 Between 1st January 1995 until 31st December 2006, 54146 patients were admitted to participating CCUs  
9 with the first registry recorded diagnosis of STEMI, defined as ST-elevation on admission ECG and a  
10 diagnosis of acute MI at discharge. Patients with pacemaker/unknown/unspecified rhythm or bundle branch  
11 block on admission were excluded. Two time periods with different dominating reperfusion strategies were  
12 chosen (Figure 1); patients admitted 1st of January 1998 until 31st of December 2000 (the early period) and  
13 patients admitted 1st of January 2004 until 31st of December 2006 (the late period). The groups were  
14 compared and gender comparisons were done in both groups.  
15  
16  
17  
18  
19  
20  
21  
22  
23  
24  
25  
26

### 27 **Statistical analyses**

28  
29 Continuous variables were summarised by their mean and standard deviation or median and interquartile  
30 range as appropriate. Categorical variables were summarised by counts and percentages. Comparisons  
31 between different strata were performed by chi-square tests for categorical variables and by student t-tests or  
32 Mann Whitney tests for continuous variables. P-values < 0.05 were considered to indicate statistical  
33 significance.  
34  
35  
36  
37  
38

39 Crude, age- and multivariable adjusted odds ratios with 95% confidence intervals were calculated from  
40 logistic regression analyses in order to compare the genders regarding use of cardiac procedures, evidence  
41 based therapies at discharge and in-hospital mortality. In addition to sex and age, the multivariable adjusted  
42 analyses included smoking, previous MI, PCI, coronary artery bypass grafting [CABG], stroke,  
43 hypertension, diabetes mellitus, COPD, heart failure, CKD, PAD, dementia, cancer within 3 years, therapies  
44 on arrival, interventional hospital and year of inclusion. Regarding use of coronary angiography, reperfusion  
45 therapy and in-hospital mortality we also added Killip class on arrival and symptom-to-door time (as a  
46  
47  
48  
49  
50  
51  
52  
53  
54  
55  
56  
57  
58  
59  
60

1 continuous variable in one hour intervals) to the multivariable adjusted analyses. Data from the logistic  
2 regression analyses are shown in forest plots.

3  
4 Hazard ratios with 95% confidence intervals were calculated from Cox proportional hazard regression  
5 analyses in order to compare the genders regarding cumulative one year mortality. The first multivariable  
6 adjusted analysis included the same variables as first described above. In a second multivariable adjusted  
7 analysis we also added reperfusion therapy and evidence-based therapies at discharge (platelet inhibitors,  
8 beta-blockers, ACE-inhibitors/ARBs and statins). Data from the Cox regression analyses are shown in forest  
9 plots.  
10

11 Missing values for all variables were controlled (1-2 %). As symptom-to-door time was available for 82 %  
12 of the patients a sensitivity analysis was done. Logistic regression analyses regarding use of coronary  
13 angiography, reperfusion therapy and in-hospital mortality were done also without incorporating symptom-  
14 to-door time. These analyses did not substantially change the results. (Supplementary table)  
15

16 All statistical analyses were performed with the SPSS (PASW Statistics) Version 18.0 software (SPSS, Inc,  
17 Chicago, Ill).  
18

### 19 **Ethical considerations**

20 The register was approved by the National Board of Health and Welfare and the process of merging the  
21 RIKS-HIA register with other registries was approved by the Swedish Data Inspection Board. The study was  
22 approved by the ethical committee and complies with the Declaration of Helsinki.  
23

## 24 **RESULTS**

### 25 **Baseline characteristics**

26 A total of 30 077 STEMI patients were admitted during the two inclusion periods, 15 697 (35% women) in  
27 1998-2000 and 14 380 (35% women) in 2004-2006. In both time periods women were older, had more often  
28 diabetes, hypertension, heart failure, COPD, PAD or previous stroke. They had more frequently diuretics,  
29 digitalis, calcium-channel blocker and long-acting nitrates on arrival and they had longer delay-times  
30



1  
2  
3  
4  
5  
6  
7  
8  
9  
10  
11  
12  
13  
14  
15  
16  
17  
18  
19  
20  
21  
22  
23  
24  
25  
26  
27  
28  
29  
30  
31  
32  
33  
34  
35  
36  
37  
38  
39  
40  
41  
42  
43  
44  
45  
46  
47  
48  
49  
50  
51  
52  
53  
54  
55  
56  
57  
58  
59  
60

whereas men were more often smokers and were previously revascularised. The mean age was the same in the two time periods. (Table I)

### Hospital care

In the early period, coronary angiography was performed in fewer women than men (18 vs. 25%). In the late period the numbers were higher in both genders (66 vs. 82%). (Table I) After multivariable adjustments women had 8 vs. 20% less chance of angiography in early and late periods, respectively (odds ratio [OR] 0.92, 95% confidence interval [CI] 0.83 – 1.02 vs. OR 0.80, 95% CI 0.71 – 0.90). (Figure 2, Supplementary table) Among patients treated with reperfusion therapy 9% were treated with pPCI in the early compared to 68% in the late period. Sixty-three percent of women compared to 71% of men received acute reperfusion therapy in the early compared to 64% and 75% in the late period. (Table II) After multivariable adjustment, women were 14 and 20% less likely to receive reperfusion therapy in the early and late periods, respectively, compared to men (OR 0.86, 95% CI 0.78 – 0.94 vs. OR 0.80, 95% CI 0.73 – 0.89). (Figure 2, Supplementary table) Patients in the early period had more often heart failure and lower Killip class but less major bleedings. In both early and late period, women had more often heart failure and bleeding complications during hospital stay. (Table I)

### Therapy at discharge

Evidence-based treatment with statins, platelet inhibitors, beta-blockers and ACE-inhibitors or ARBs were prescribed more often in the late compared to the early period in both genders. All evidence-based therapies were prescribed more seldom to women in both periods. (Table I) Women still had less chance of receiving ACE-inhibitors/ARBs but higher chance of receiving statins after multivariable adjustments in the early period. In the late period women had 14 – 25% less chance of receiving any of these therapies after multivariable adjustments. (Figure 2, Supplementary table)

TABLE I Baseline characteristics, management and outcome

|                                          | Early period: Year 1998-2000 |                    |         | Late period: Year 2004-2006 |                    |         | Periods compared |
|------------------------------------------|------------------------------|--------------------|---------|-----------------------------|--------------------|---------|------------------|
|                                          | Men<br>(n=10151)             | Women<br>(n=5546)  | p-value | Men<br>(n=9386)             | Women<br>(n=4994)  | p-value | p-value          |
| Age, in years (standard deviations)      | 66.4 (12.2)                  | 72.9 (11.5)        | <0.001  | 65.9 (12.2)                 | 72.4 (12.1)        | <0.001  | 0.11             |
| Symptom-to-door time, h:m (IQR)*         | 2:45 (1:39 – 5:10)           | 3:15 (1:54 – 6:15) | <0.001  | 3:00 (1:40 – 5:50)          | 3:30 (2:00 – 6:30) | <0.001  | <0.001‡          |
| <b>Co-morbidity</b>                      |                              |                    |         |                             |                    |         |                  |
| Current smoker                           | 2762 (28.9)                  | 1220 (23.8)        | <0.001  | 2680 (30.9)                 | 1224 (27.6)        | <0.001  | <0.001‡          |
| Previous myocardial infarction           | 1781 (17.5)                  | 742 (13.4)         | <0.001  | 1062 (11.3)                 | 529 (10.6)         | 0.19    | <0.001†          |
| Previous PCI                             | 287 (2.9)                    | 87 (1.6)           | <0.001  | 372 (4.0)                   | 110 (2.2)          | <0.001  | <0.001‡          |
| Previous coronary artery bypass grafting | 307 (3.1)                    | 58 (1.1)           | <0.001  | 308 (3.3)                   | 82 (1.7)           | <0.001  | 0.05 ‡           |
| Diabetes Mellitus                        | 1758 (17.3)                  | 1198 (21.6)        | <0.001  | 1679 (17.9)                 | 1014 (20.3)        | <0.001  | 0.82             |
| Hypertension                             | 2736 (27.2)                  | 1972 (36.0)        | <0.001  | 3053 (32.8)                 | 2195 (44.5)        | <0.001  | <0.001‡          |
| Congestive heart failure                 | 586 (5.8)                    | 518 (9.3)          | <0.001  | 406 (4.3)                   | 455 (9.1)          | <0.001  | <0.001†          |
| Previous stroke                          | 769 (7.6)                    | 509 (9.2)          | <0.001  | 780 (8.3)                   | 523 (10.5)         | <0.001  | 0.04‡            |
| Chronic kidney disease                   | 89 (0.9)                     | 40 (0.7)           | 0.30    | 113 (1.2)                   | 72 (1.4)           | <0.001  | <0.001‡          |
| Chronic obstructive pulmonary disease    | 448 (4.4)                    | 358 (6.5)          | <0.001  | 465 (5.0)                   | 440 (8.8)          | <0.001  | <0.001‡          |

|                                     |             |             |        |             |             |        |         |
|-------------------------------------|-------------|-------------|--------|-------------|-------------|--------|---------|
| Cancer within 3 years               | 246 (2.4)   | 160 (2.9)   | 0.08   | 277 (3.0)   | 149 (3.0)   | 0.91   | 0.05‡   |
| <b>Therapy on arrival</b>           |             |             |        |             |             |        |         |
| Aspirin                             | 2680 (26.6) | 1512 (27.5) | 0.25   | 2127 (22.9) | 1440 (29.2) | <0.001 | <0.001† |
| Other platelet inhibitor            | 37 (0.4)    | 16 (0.3)    | 0.43   | 309 (3.3)   | 195 (3.9)   | 0.05   | <0.001‡ |
| Beta-blocker                        | 2525 (25.1) | 1544 (28.1) | <0.001 | 2194 (23.6) | 1565 (31.8) | <0.001 | 0.57    |
| ACE inhibitor/ARB                   | 1081 (10.7) | 586 (10.7)  | 0.89   | 1553 (16.7) | 924 (18.7)  | 0.002  | <0.001‡ |
| Statin                              | 750 (7.5)   | 318 (5.8)   | <0.001 | 1249 (13.4) | 621 (12.6)  | 0.16   | <0.001‡ |
| Oral anticoagulant                  | 271 (2.7)   | 109 (2.0)   | 0.006  | 232 (2.5)   | 119 (2.4)   | 0.76   | 0.91    |
| Calcium-channel blocker             | 1304 (13.0) | 786 (14.3)  | 0.02   | 1075 (11.6) | 722 (14.6)  | <0.001 | 0.04†   |
| Diuretics                           | 1453 (14.4) | 1520 (27.7) | <0.001 | 1182 (12.7) | 1407 (28.5) | <0.001 | 0.04†   |
| Digitalis                           | 388 (3.9)   | 343 (6.3)   | <0.001 | 156 (1.7)   | 214 (4.3)   | <0.001 | <0.001† |
| Long-acting nitrates                | 1053 (10.5) | 679 (12.4)  | <0.001 | 487 (5.2)   | 435 (8.8)   | <0.001 | <0.001† |
| <b>CCU procedures and therapies</b> |             |             |        |             |             |        |         |
| Echocardiography                    | 6200 (64.2) | 2970 (57.8) | <0.001 | 6842 (73.7) | 3282 (66.5) | <0.001 | <0.001‡ |
| Coronary angiography                | 2539 (25.0) | 975 (17.6)  | <0.001 | 7686 (81.9) | 3316 (66.4) | <0.001 | <0.001‡ |
| Reperfusion therapy, all            | 7194 (70.9) | 3500 (63.1) | <0.001 | 7065 (75.3) | 3174 (63.6) | <0.001 | <0.001‡ |
| Fibrinolytics                       | 6419 (63.3) | 3223 (58.2) | <0.001 | 1944 (21.0) | 1006 (20.4) | 0.44   | <0.001‡ |
| Primary PCI                         | 713 (7.0)   | 248 (4.5)   | <0.001 | 4898 (52.2) | 2033 (40.7) | <0.001 | <0.001‡ |
| <b>Complications</b>                |             |             |        |             |             |        |         |
| Killip class II-IV                  | 2912 (29.5) | 2077 (38.6) | <0.001 | 991 (11.1)  | 847 (18.4)  | <0.001 | <0.001  |

|    |                                                   |             |             |      |             |             |              |  |
|----|---------------------------------------------------|-------------|-------------|------|-------------|-------------|--------------|--|
|    |                                                   |             | 01          |      |             | 01          |              |  |
| 1  |                                                   |             | <0.0        |      |             | <0.0        |              |  |
| 2  | Major bleeding †                                  | 67 (1.1)    | 62 (2.0)    | 01   | 104 (1.6)   | 120 (4.0)   | <0.001‡      |  |
| 3  |                                                   |             |             |      |             |             |              |  |
| 4  |                                                   |             | 01          |      |             | 01          |              |  |
| 5  | Re-infarction during                              |             | 0.00        |      |             |             |              |  |
| 6  | hospital stay                                     | 281 (2.9)   | 205 (3.9)   | 1    | 150 (1.6)   | 94 (1.9)    | 0.21 <0.001† |  |
| 7  |                                                   |             |             |      |             |             |              |  |
| 8  | <b>Therapy at discharge in hospital survivors</b> |             |             |      |             |             |              |  |
| 9  |                                                   |             |             |      |             |             |              |  |
| 10 |                                                   |             |             |      |             |             |              |  |
| 11 | Aspirin                                           | 7994 (87.5) | 4004 (86.1) | 0.02 | 8318 (93.6) | 4062 (91.2) | <0.001‡      |  |
| 12 |                                                   |             |             |      |             |             |              |  |
| 13 |                                                   |             |             |      |             |             |              |  |
| 14 | Other platelet inhibitor                          | 800 (8.8)   | 330 (7.1)   | 0.00 | 6978 (78.5) | 3045 (68.4) | <0.001‡      |  |
| 15 |                                                   |             |             | 1    |             |             |              |  |
| 16 |                                                   |             |             |      |             |             |              |  |
| 17 | Beta-blocker                                      | 7801 (85.4) | 3812 (82.1) | <0.0 | 8105 (91.2) | 3895 (87.5) | <0.001‡      |  |
| 18 |                                                   |             |             | 01   |             |             |              |  |
| 19 |                                                   |             |             |      |             |             |              |  |
| 20 | ACE inhibitor/ARB                                 | 3934 (43.4) | 1952 (42.4) | 0.25 | 5894 (66.4) | 2719 (61.1) | <0.001‡      |  |
| 21 |                                                   |             |             |      |             |             |              |  |
| 22 |                                                   |             |             |      |             |             |              |  |
| 23 | Statin                                            | 3991 (44.0) | 1757 (38.1) | <0.0 | 7570 (85.2) | 3279 (73.8) | <0.001‡      |  |
| 24 |                                                   |             |             | 01   |             |             |              |  |
| 25 |                                                   |             |             |      |             |             |              |  |
| 26 |                                                   |             |             |      |             |             |              |  |
| 27 | <b>Outcome</b>                                    |             |             |      |             |             |              |  |
| 28 |                                                   |             |             |      |             |             |              |  |
| 29 | In-hospital mortality                             | 837 (8.3)   | 800 (14.5)  | <0.0 | 464 (4.9)   | 521 (10.4)  | <0.001†      |  |
| 30 |                                                   |             |             | 01   |             |             |              |  |
| 31 |                                                   |             |             |      |             |             |              |  |
| 32 | One year mortality                                | 1576 (15.5) | 1324 (23.9) | <0.0 | 961 (10.3)  | 955 (19.1)  | <0.001†      |  |
| 33 |                                                   |             |             | 01   |             |             |              |  |
| 34 |                                                   |             |             |      |             |             |              |  |

Data presented as numbers (percentages) if not otherwise indicated. §Intracranial haemorrhage, mortal bleeding or given blood transfusion in patients treated with reperfusion therapy. † More in early period ‡ More in late period

IQR, interquartile range; PCI, percutaneous coronary intervention; ACE, angiotensin converting enzyme; ARB, angiotensin receptor blocker; CCU, coronary care unit

## Mortality

In-hospital as well as cumulative one year mortality was higher in the early than in the late period in both genders. Women had about twice as high in-hospital as well as one year mortality in both periods. (Table I)

After multivariable adjustments the in-hospital mortality was around 20% higher in women in both periods (OR 1.17, 95% CI 1.02 – 1.36 vs. OR 1.21, 95% CI 1.00 – 1.46). The one year mortality was 5 and 11%

1  
2  
3  
4  
5  
6  
7  
8  
9  
10  
11  
12  
13  
14  
15  
16  
17  
18  
19  
20  
21  
22  
23  
24  
25  
26  
27  
28  
29  
30  
31  
32  
33  
34  
35  
36  
37  
38  
39  
40  
41  
42  
43  
44  
45  
46  
47  
48  
49  
50  
51  
52  
53  
54  
55  
56  
57  
58  
59  
60

higher in women in the early and late period respectively, although it did not reach statistical significance in the early period (hazard ratio [HR] 1.05, 95% CI 0.97-1.14 vs. HR 1.11, 95% CI 1.00 – 1.24). After adding adjustment for reperfusion therapy and evidence-based treatment at discharge, there was no longer any gender difference in long-term mortality (HR 0.95, 5% CI 0.87 – 1.05 vs. HR 0.96, 95% CI 0.86 – 1.08).

(Figure 3, Supplementary table)

## DISCUSSION

After the reperfusion strategy change patients admitted during the first decade of the 21st century were treated with reperfusion therapy more often than patients admitted during the late 1990s. Anyhow, we did not find a diminished gender gap neither regarding use of reperfusion therapy, nor regarding mortality. Even more surprising was the finding that women had 14-25% less chance of receiving evidence-based cardiovascular treatment in the late period after multivariable adjustments.

Previous trials during the fibrinolytic era have found higher mortality in women, but usually without separating STEMI from NSTEMI ACS.[1] In STEMI studies, the risk of early death has been 10-25% higher in women after multivariable adjustments [2, 5, 6, 16] although most STEMI-cohorts have been extracted from randomised controlled trials [2, 6] and may not correspond to the real life population. Fibrinolytics has been given to fewer women even if eligibility has been considered.[17] Also in our study women had 14% lower chance of receiving reperfusion therapy in the early group where fibrinolytics accounted for 91% of the reperfusion therapy. As an increased risk of intracranial haemorrhage and other major bleedings has been found in women treated with fibrinolytics,[18] a fear of these dreadful complications may explain some of the observed difference. The well-known longer delay-times in women could be another explanation. In our study women had 30 min longer delay times from symptom onset to arrival to CCU or the cath lab in both time periods. Adjusting for this did not change the results.

As primary PCI has been shown superior to fibrinolytics in reducing mortality after STEMI,[19] it has been recommended in the ESC guidelines since 2003.[20] In Sweden it has been the dominant reperfusion strategy

1 from 2004 and onwards. (Figure 1) During this new pPCI era the evidence that gender per se bears  
2 prognostic information is less firm and data is contrasting. [10, 21] When we started our study and formed  
3 our hypothesis there were only small and mainly single-centre studies published.[7, 8, 10, 21] The majority  
4 of those did not find female gender to be an independent predictor of adverse outcome after pPCI.[7, 10]  
5 Mehilli et al found better myocardial salvage in women than in men after pPCI which they speculated could  
6 be due to a higher hypoxia tolerance in women because of higher incidence of pre-infarction angina  
7 (ischemic pre-conditioning) and more often spontaneous thrombolysis. [22] Also, as pPCI is less time-  
8 dependent than fibrinolytics, women could be expected to benefit more than men from a reperfusion strategy  
9 change because of their consistently longer symptom-to-door time. [10]  
10 Thus, our hypothesis was that the gender gap in reperfusion therapy would diminish after the shift to a  
11 reperfusion strategy that could be more advantageous to women. This hypothesis was not confirmed. The  
12 rate of reperfusion in men increased from 70.9% to 75.3% whereas the increase in women was very modest,  
13 63.1% to 63.6%. The reason for the finding is for us unclear. Mean age was the same in the two periods and  
14 women had 30 min longer symptom-to-door time in both periods. One possible reason could be higher  
15 prevalence of normal coronary arteries in women, which is shown before although mainly in NSTEMI and  
16 mixed ACS populations.[23] In our study, during the early period we had coronary angiography findings  
17 from few patients (56% of the 3514 patients that underwent coronary angiography). In the late period we  
18 had findings on 97 % of the 11 002 examined patients showing that 3% of men and 7 % of women had non-  
19 obstructive coronary artery disease. Thus, normal coronary arteries can hardly explain the gap in reperfusion  
20 therapy in the early period when fibrinolytics was dominating and angiography seldom performed. In the  
21 late period it could account for a small part of the difference in use of primary PCI although it does not  
22 explain the gender gap in use of coronary angiography, which also increased between the two time periods.  
23  
24  
25  
26  
27  
28  
29  
30  
31  
32  
33  
34  
35  
36  
37  
38  
39  
40  
41  
42  
43  
44  
45  
46  
47  
48  
49  
50  
51 During the last decade several important randomised controlled trials have been published encouraging more  
52 effective secondary prevention in CAD patients.[24, 25] Use of ACE-inhibitors/ARBs, dual platelet  
53 inhibition and statins has thus increased dramatically in the STEMI population during this decade and  
54  
55  
56  
57  
58  
59  
60

1 mortality has declined. We found increased use of all secondary prevention drugs, even those with older  
2 evidence such as aspirin and beta-blockers. However, the increase of all the evidence-based therapies was  
3 more pronounced in men than in women. In spite of the intense focus on the gender aspect in the ACS field  
4 during the last two decades, together with the focus on adherence to guidelines, the treatment gap was even  
5 more pronounced in the late compared to the early group. Even after multivariable adjustment, women had  
6 14-25% lesser chance of receiving any of these drugs at discharge.  
7  
8

9 We cannot fully explain this gender gap in management. Maybe a fear of doing harm because of the well-  
10 known higher risk of bleeding in women [26] or reports from patients of previous or current adverse effects  
11 are reasons for the bias. It has been shown in previous studies that women report side effects more often than  
12 men, especially if the same dosages are used. [27] Finally, we could speculate that doctors tend to adapt to  
13 new treatment modalities and new guidelines faster in men than in women, especially in older cohorts. We  
14 did some subgroup analyses of different age groups (not included in the manuscript) where we found the  
15 treatment bias clearest in the oldest cohort.  
16  
17  
18  
19  
20  
21  
22  
23  
24  
25  
26  
27  
28  
29  
30

31 A more effective reperfusion strategy with pPCI and the increased use of evidence-based treatment has been  
32 associated with improved outcome. Thus we found reduced mortality in the late compared to the early  
33 period in both genders. However we also found a persistent gender gap both regarding short- and long-term  
34 mortality. In-hospital mortality was approximately 20% higher in both time periods consistent with previous  
35 STEMI studies focusing on gender from the fibrinolytic era.[2, 5, 6, 16] From the PCI era, two recent  
36 publications by Benamer et al and Sadowski et al found that there is still a gender difference in in-hospital  
37 mortality among STEMI patients consistent with our findings. [28, 29] In addition, one year mortality was  
38 higher in our study, 5 vs. 11% higher in the early and late periods, respectively. If we also incorporated  
39 evidence-based treatment at discharge and reperfusion therapy in the multivariable adjustments, there was  
40 no longer a significant gender difference in long-term mortality.  
41  
42  
43  
44  
45  
46  
47  
48  
49  
50  
51  
52  
53  
54  
55  
56  
57  
58  
59  
60

1 In USA, the American College of Cardiology's AMI Guidelines Applied in Practice (GAP) program is  
2 proven to increase the use of evidenced based medicine and reduce MI mortality but is less used in  
3 women.[30] The results in our study are in concordance with those findings.  
4  
5  
6  
7  
8

### 9 **Limitations**

10 As in all registries on clinical practice, one limitation is the handling of missing data. In the RIKS-HIA  
11 register, we have data for around 95% of the patients for almost all variables that is mandatory for the  
12 hospitals to register. Furthermore, as in all observational data sets, the adjustment might be influenced by the  
13 lack of registration on some possible confounding factors in the data base e.g. non-cardiac co-morbidities  
14 and contra-indications for specific treatments. However a strength is the large number of patients allowing  
15 adjustment for baseline differences between the compared groups.  
16  
17  
18  
19  
20  
21  
22  
23  
24  
25  
26

### 27 **CONCLUSION**

28 Our study showed improved management and reduced mortality in STEMI patients in the late compared to  
29 the early period. Adherence to treatment guidelines was better in men than in women. In fact the treatment  
30 gap seemed even more pronounced in the new era. Thus a better adherence to treatment guidelines in  
31 women is mandatory as it might reduce the differences in long-term outcome between the genders. There is  
32 also a great need of studies scrutinising the gender differences in management of STEMI in the new pPCI  
33 era.  
34  
35  
36  
37  
38  
39  
40  
41  
42  
43  
44  
45  
46

### 47 **Acknowledgments**

48 We thank all the participating hospitals for their cooperation in contributing data to RIKS-HIA.

49 We would especially like to thank late associate professor Ulf Stenestrand at the Department of Medical and  
50 Health Sciences, Division of Cardiovascular Medicine, Linköping University Hospital. He, a key founder of  
51  
52  
53  
54  
55  
56  
57  
58  
59  
60



1 the RIKS-HIA register, helped in the preparation of the database and in management, analysis and  
2 interpretation of the data.  
3  
4

### 5 **Funding**

6  
7 The RIKS-HIA register (today SWEDEHEART) is supported by the National Board of Health and Welfare,  
8 the Swedish Society of Cardiology and the Swedish Association of Local Authorities and Regions. The  
9 funding sources had no role in the study such as being involved in study design, data collection, analysis and  
10 interpretation of data or in manuscript writing.  
11  
12  
13  
14  
15

### 16 **Disclosures**

17 None.  
18  
19  
20  
21  
22  
23  
24  
25  
26  
27  
28  
29  
30  
31  
32  
33  
34  
35  
36  
37  
38  
39  
40  
41  
42  
43  
44  
45  
46  
47  
48  
49  
50  
51  
52  
53  
54  
55  
56  
57  
58  
59  
60

## REFERENCES

- 1 Milcent C, Dormont B, Durand-Zaleski I, et al. Gender differences in hospital mortality and use of percutaneous coronary intervention in acute myocardial infarction: microsimulation analysis of the 1999 nationwide French hospitals database. *Circulation* 2007;**115**:833-9.
- 2 Mega JL, Morrow DA, Ostor E, et al. Outcomes and optimal antithrombotic therapy in women undergoing fibrinolysis for ST-elevation myocardial infarction. *Circulation* 2007;**115**:2822-8.
- 3 Gan SC, Beaver SK, Houck PM, et al. Treatment of acute myocardial infarction and 30-day mortality among women and men. *N Engl J Med* 2000;**343**:8-15.
- 4 Bugiardini R, Yan AT, Yan RT, et al. Factors influencing underutilization of evidence-based therapies in women. *Eur Heart J* 2011;**11**:1337-44.
- 5 Jneid H, Fonarow GC, Cannon CP, et al. Sex differences in medical care and early death after acute myocardial infarction. *Circulation* 2008;**118**:2803-10.
- 6 Berger JS, Elliott L, Gallup D, et al. Sex differences in mortality following acute coronary syndromes. *Jama* 2009;**302**:874-82.
- 7 De Luca G, Gibson CM, Gyongyosi M, et al. Gender-related differences in outcome after ST-segment elevation myocardial infarction treated by primary angioplasty and glycoprotein IIb-IIIa inhibitors: insights from the EGYPT cooperation. *J Thromb Thrombolysis* 2010;**30**:342-6.
- 8 Antonucci D, Valenti R, Moschi G, et al. Sex-based differences in clinical and angiographic outcomes after primary angioplasty or stenting for acute myocardial infarction. *Am J Cardiol* 2001;**87**:289-93.
- 9 De Luca G, Suryapranata H, Dambrink JH, et al. Sex-related differences in outcome after ST-segment elevation myocardial infarction treated by primary angioplasty: data from the Zwolle Myocardial Infarction study. *Am Heart J* 2004;**148**:852-6.
- 10 Motovska Z, Widimsky P, Aschermann M. The impact of gender on outcomes of patients with ST elevation myocardial infarction transported for percutaneous coronary intervention: analysis of the PRAGUE-1 and 2 studies. *Heart* 2008;**94**:e5.

- 1  
2  
3  
4  
5  
6  
7  
8  
9  
10  
11  
12  
13  
14  
15  
16  
17  
18  
19  
20  
21  
22  
23  
24  
25  
26  
27  
28  
29  
30  
31  
32  
33  
34  
35  
36  
37  
38  
39  
40  
41  
42  
43  
44  
45  
46  
47  
48  
49  
50  
51  
52  
53  
54  
55  
56  
57  
58  
59  
60
- 11 Bassand JP, Hamm CW, Ardissino D, et al. Guidelines for the diagnosis and treatment of non-ST-segment elevation acute coronary syndromes. The Task Force for the Diagnosis and Treatment of Non-ST-Segment Elevation Acute Coronary Syndromes of the European Society of Cardiology. *Eur Heart J* 2007;**28**:1598-660.
- 12 Van de Werf F, Bax J, Betriu A, et al. Management of acute myocardial infarction in patients presenting with persistent ST-segment elevation: the Task Force on the Management of ST-Segment Elevation Acute Myocardial Infarction of the European Society of Cardiology. *Eur Heart J* 2008;**29**:2909-45.
- 13 Jernberg T, Attebring MF, Hambraeus K, et al. The Swedish Web-system for enhancement and development of evidence-based care in heart disease evaluated according to recommended therapies (SWEDEHEART). *Heart* 2010;**96**:1617-21.
- 14 Tunstall-Pedoe H, Kuulasmaa K, Amouyel P, et al. Myocardial infarction and coronary deaths in the World Health Organization MONICA Project. Registration procedures, event rates, and case-fatality rates in 38 populations from 21 countries in four continents. *Circulation* 1994;**90**:583-612.
- 15 Alpert JS, Thygesen K, Antman E, et al. Myocardial infarction redefined--a consensus document of The Joint European Society of Cardiology/American College of Cardiology Committee for the redefinition of myocardial infarction. *J Am Coll Cardiol* 2000;**36**:959-69.
- 16 Champney KP, Frederick PD, Bueno H, et al. The joint contribution of sex, age and type of myocardial infarction on hospital mortality following acute myocardial infarction. *Heart* 2009;**95**:895-9.
- 17 Eagle KA, Goodman SG, Avezum A, et al. Practice variation and missed opportunities for reperfusion in ST-segment-elevation myocardial infarction: findings from the Global Registry of Acute Coronary Events (GRACE). *Lancet* 2002;**359**:373-7.
- 18 Reynolds HR, Farkouh ME, Lincoff AM, et al. Impact of female sex on death and bleeding after fibrinolytic treatment of myocardial infarction in GUSTO V. *Arch Intern Med* 2007;**167**:2054-60.
- 19 Keeley EC, Boura JA, Grines CL. Primary angioplasty versus intravenous thrombolytic therapy for acute myocardial infarction: a quantitative review of 23 randomised trials. *Lancet* 2003;**361**:13-20.

- 1  
2  
3  
4  
5  
6  
7  
8  
9  
10  
11  
12  
13  
14  
15  
16  
17  
18  
19  
20  
21  
22  
23  
24  
25  
26  
27  
28  
29  
30  
31  
32  
33  
34  
35  
36  
37  
38  
39  
40  
41  
42  
43  
44  
45  
46  
47  
48  
49  
50  
51  
52  
53  
54  
55  
56  
57  
58  
59  
60
- 20 Van de Werf F, Ardissino D, Betriu A, et al. Management of acute myocardial infarction in patients presenting with ST-segment elevation. The Task Force on the Management of Acute Myocardial Infarction of the European Society of Cardiology. *Eur Heart J* 2003;**24**:28-66.
- 21 Vakili BA, Kaplan RC, Brown DL. Sex-based differences in early mortality of patients undergoing primary angioplasty for first acute myocardial infarction. *Circulation* 2001;**104**:3034-8.
- 22 Mehilli J, Ndrepepa G, Kastrati A, et al. Gender and myocardial salvage after reperfusion treatment in acute myocardial infarction. *J Am Coll Cardiol* 2005;**45**:828-31.
- 23 Larsen AI, Galbraith PD, Ghali WA, et al. Characteristics and outcomes of patients with acute myocardial infarction and angiographically normal coronary arteries. *Am J Cardiol* 2005;**95**:261-3.
- 24 Yusuf S, Zhao F, Mehta SR, et al. Effects of clopidogrel in addition to aspirin in patients with acute coronary syndromes without ST-segment elevation. *N Engl J Med* 2001;**345**:494-502.
- 25 Yusuf S, Sleight P, Pogue J, et al. Effects of an angiotensin-converting-enzyme inhibitor, ramipril, on cardiovascular events in high-risk patients. The Heart Outcomes Prevention Evaluation Study Investigators. *N Engl J Med* 2000;**342**:145-53.
- 26 Manoukian SV. Predictors and impact of bleeding complications in percutaneous coronary intervention, acute coronary syndromes, and ST-segment elevation myocardial infarction. *Am J Cardiol* 2009;**104**:9C-15C.
- 27 Oertelt-Prigione S, Regitz-Zagrosek V. Gender aspects in cardiovascular pharmacology. *J Cardiovasc Transl Res* 2009;**2**:258-66.
- 28 Sadowski M, Gasior M, Gierlotka M, et al. Gender-related differences in mortality after ST-segment elevation myocardial infarction: a large multicentre national registry. *EuroIntervention* 2011;**6**:1068-72.
- 29 Benamer H, Tafflet M, Bataille S, et al. Female gender is an independent predictor of in-hospital mortality after STEMI in the era of primary PCI: insights from the greater Paris area PCI Registry. *EuroIntervention* 2011;**6**:1073-9.

30 Jani SM, Montoye C, Mehta R, et al. Sex differences in the application of evidence-based therapies for  
the treatment of acute myocardial infarction: the American College of Cardiology's Guidelines Applied in  
Practice projects in Michigan. *Arch Intern Med* 2006;**166**:1164-70.

For peer review only

1  
2  
3  
4  
5  
6  
7  
8  
9  
10  
11  
12  
13  
14  
15  
16  
17  
18  
19  
20  
21  
22  
23  
24  
25  
26  
27  
28  
29  
30  
31  
32  
33  
34  
35  
36  
37  
38  
39  
40  
41  
42  
43  
44  
45  
46  
47  
48  
49  
50  
51  
52  
53  
54  
55  
56  
57  
58  
59  
60

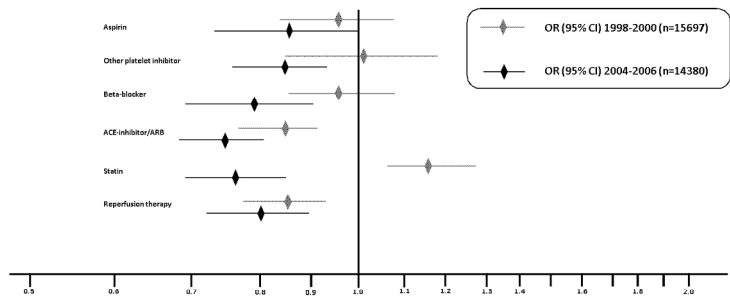

Use of coronary angiography, reperfusion therapy and evidence based therapies at discharge in STEMI patients in two time periods after multivariable adjustments, women vs. men  
180x119mm (300 x 300 DPI)

view only

1  
2  
3  
4  
5  
6  
7  
8  
9  
10  
11  
12  
13  
14  
15  
16  
17  
18  
19  
20  
21  
22  
23  
24  
25  
26  
27  
28  
29  
30  
31  
32  
33  
34  
35  
36  
37  
38  
39  
40  
41  
42  
43  
44  
45  
46  
47  
48  
49  
50  
51  
52  
53  
54  
55  
56  
57  
58  
59  
60

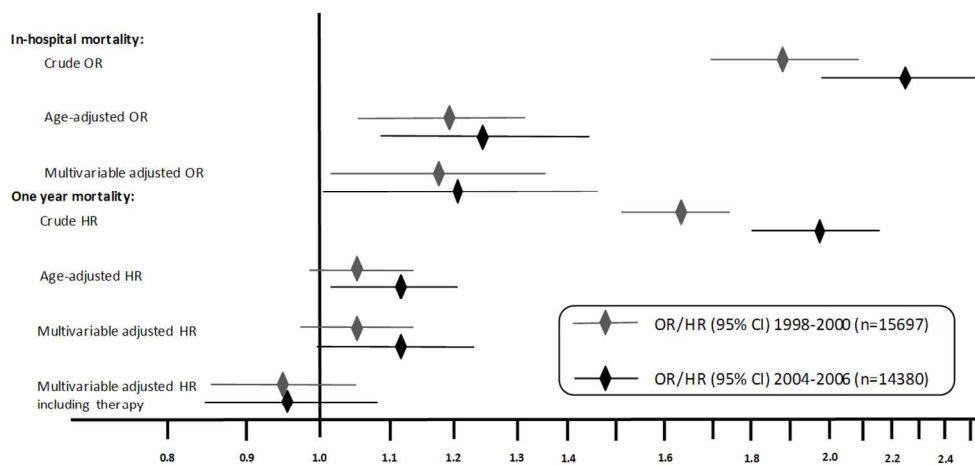

In-hospital and cumulative one year mortality in STEMI patients in two time periods with different dominating reperfusion strategies. Crude, age-adjusted and multivariable adjusted odds and hazard ratios with 95% confidence intervals, women vs. men  
295x190mm (120 x 120 DPI)

view only

## Abstract

**Objective:** In ST-elevation myocardial infarction [STEMI] women received less evidence-based medicine [EBM] and had worse outcome during the fibrinolytic era. With the shift to primary percutaneous coronary intervention [pPCI] as preferred reperfusion strategy, we aimed to investigate whether these gender differences has diminished.

**Design, setting and participants:** Cohort study including consecutive STEMI patients registered 1998 – 2000 (n=15697) and 2004 – 2006 (n=14380) in the Register of Information and Knowledge about Swedish Heart Intensive care Admissions.

**Outcome measures:** EBM use, in-hospital and one year mortality.

**Results:** Reperfusion therapy (pPCI in 9 vs. 68%, early vs. late period) was given to 63 vs. 71% and 64 vs. 75%, women vs. men in the two respective periods, OR 0.86 (95% CI 0.78 – 0.94) and 0.80 (0.73 – 0.89) after multivariable adjustments. In the late period women had 14 – 25% less chance of receiving EBM at discharge (OR 0.75, 95% CI 0.68 – 0.81 thru 0.86, 0.77 – 0.95). Gender differences in the early period were small. In both periods, multivariable adjusted in-hospital mortality was higher in women, OR 1.17 (95% CI 1.02 – 1.14) and 1.21 (1.00 – 1.46). One year mortality was gender equal, HR 0.95 (95% CI 0.87– 1.05) and 0.96 (0.86 – 1.08), after adding EBM to the multivariable adjustments.

**Conclusion:** In spite of an intense gender debate, focus on guideline adherence and the change in reperfusion strategy the last decade gender differences in use of reperfusion therapy and evidence-based therapy at discharge did not decline during the study period. Moreover, higher mortality in women persisted.



1  
2  
3  
4  
5  
6  
7  
8  
9  
10  
11  
12  
13  
14  
15  
16  
17  
18  
19  
20  
21  
22  
23  
24  
25  
26  
27  
28  
29  
30  
31  
32  
33  
34  
35  
36  
37  
38  
39  
40  
41  
42  
43  
44  
45  
46  
47  
48  
49  
50  
51  
52  
53  
54  
55  
56  
57  
58  
59  
60

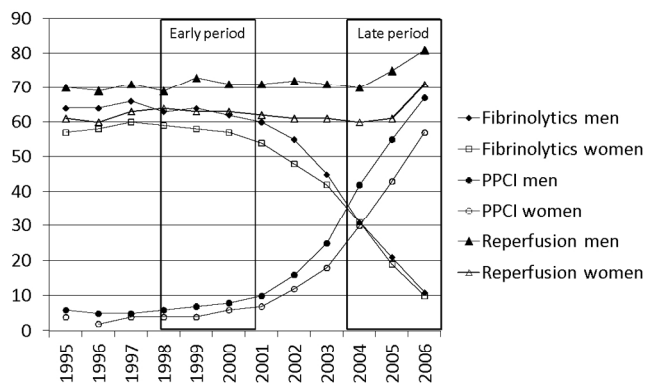

Trends in reperfusion therapy among Swedish STEMI patients 1995 – 2006  
119x180mm (300 x 300 DPI)



**Time trends in STEMI - improved treatment and outcome  
but still a gender gap:  
A prospective, observational cohort study from the  
SWEDEHEART register**

|                                 |                                                                                                                                                                                                                                                                                                                                                                                                                  |
|---------------------------------|------------------------------------------------------------------------------------------------------------------------------------------------------------------------------------------------------------------------------------------------------------------------------------------------------------------------------------------------------------------------------------------------------------------|
| Journal:                        | <i>BMJ Open</i>                                                                                                                                                                                                                                                                                                                                                                                                  |
| Manuscript ID:                  | bmjopen-2011-000726.R1                                                                                                                                                                                                                                                                                                                                                                                           |
| Article Type:                   | Research                                                                                                                                                                                                                                                                                                                                                                                                         |
| Date Submitted by the Author:   | 27-Jan-2012                                                                                                                                                                                                                                                                                                                                                                                                      |
| Complete List of Authors:       | Sederholm Lawesson, Sofia; Department of Medical and Health Sciences, Division of Cardiovascular Medicine;<br>Alfredsson, Joakim; Department of Medical and Health Sciences, Division of Cardiovascular Medicine<br>Fredrikson, Mats; Department of Clinical and Experimental Medicine, Faculty of Health Sciences<br>Swahn, Eva; Department of Medical and Health Sciences, Division of Cardiovascular Medicine |
| <b>Primary Subject Heading</b>: | Cardiovascular medicine                                                                                                                                                                                                                                                                                                                                                                                          |
| Secondary Subject Heading:      | Cardiovascular medicine                                                                                                                                                                                                                                                                                                                                                                                          |
| Keywords:                       | Coronary heart disease < CARDIOLOGY, Ischaemic heart disease < CARDIOLOGY, Myocardial infarction < CARDIOLOGY                                                                                                                                                                                                                                                                                                    |
|                                 |                                                                                                                                                                                                                                                                                                                                                                                                                  |

SCHOLARONE™  
Manuscripts

only

# Time trends in STEMI - improved treatment and outcome but still a gender gap

## A prospective, observational cohort study from the SWEDEHEART register

Sofia Sederholm Lawesson, MD\*, Joakim Alfredsson, MD, PhD\*, Mats Fredrikson, PhD\*\*, Eva Swahn, MD PhD, FESC, FACC\*

\*Department of Medical and Health Sciences, Division of Cardiovascular Medicine, Linköping University Hospital, Linköping, Sweden.

\*\* Department of Clinical and Experimental Medicine, Faculty of Health Sciences, Linköping University, Linköping, Sweden.

### Address for correspondence

Sofia Sederholm Lawesson, M.D.

Department of Medical and Health Sciences, Division of Cardiovascular Medicine

Linköping University Hospital

SE-581 85 Linköping

SWEDEN

Telephone: +4610103000

Fax: +46101032171

Email: [sofia.sederholm.lavesson@lio.se](mailto:sofia.sederholm.lavesson@lio.se), [sofia.lawesson@liu.se](mailto:sofia.lawesson@liu.se)

**Keywords:** ST-elevation myocardial infarction, sex factors, reperfusion therapy, mortality, evidence-based medicine

**Word count:** 2999 (Manuscript only. Title page, summary, contributorship statement, table and references not included in word count)

**Data sharing statement:** There is no additional data available

**Contributorship statement:**

1  
2 Sofia Sederholm Lawesson has substantially contributed to conception and design of the study. She has  
3 handled, analysed and interpreted all the data and drafted the article.  
4

5 Joakim Alfredsson has substantially contributed to conception and design, help with analyses and  
6 interpretation of the data. He has revised the draft critically for important intellectual content and approved  
7 the final version to be published.  
8

9  
10 Mats Fredrikson has substantially contributed with analysing and interpreting the data, revising the draft  
11 critically and approved the final version to be published.  
12

13 Eva Swahn has substantially contributed to conception and design, help with analysing and interpreting the  
14 data. She revised the draft critically for important intellectual content and approved the final version to be  
15 published.  
16  
17  
18  
19  
20  
21  
22  
23  
24  
25  
26  
27  
28  
29  
30  
31  
32  
33  
34  
35  
36  
37  
38  
39  
40  
41  
42  
43  
44  
45  
46  
47  
48  
49  
50  
51  
52  
53  
54  
55  
56  
57  
58  
59  
60

## Summary

### *Article focus:*

With 1) the focus on treatment guidelines, 2) the attention on gender differences in management and outcome and 3) the change in reperfusion strategy in STEMI the last decade, we hypothesised;

- That gender differences in adherence to treatment guidelines would have diminished
- That gender differences in outcome would have decreased

### *Key messages:*

- Management improved and mortality decreased in STEMI patients in the late compared to the early period.
- The gender treatment gap did not decrease between the two time periods.
- The gender outcome gap did not decrease between the two time periods.

### *Strengths and limitations:*

The study included a huge amount of STEMI patients, with enough numbers to assure adequate statistical analyses. SWEDEHEART registry is a unique Swedish National Quality registry, with quality control and audit measures, covering all hospitals in Sweden treating STEMI patients and has standardised criteria for defining MI. Mortality data are complete as the vital status of all Swedish citizens is registered in the Cause of Death Registry. One limitation is the nonrandomised, observational nature. Thus multivariate analyses were used in order to reduce the bias inherent in this type of studies. Adjustments might be influenced by the lack of registration on some possible confounding factors in the data base e.g. non-cardiac co-morbidities and contra-indications for specific treatments.

## Abstract

**Objective:** In ST-elevation myocardial infarction [STEMI] women received less evidence-based medicine [EBM] and had worse outcome during the fibrinolytic era. With the shift to primary percutaneous coronary intervention [pPCI] as preferred reperfusion strategy, we aimed to investigate whether these gender differences has diminished.

**Design, setting and participants:** Cohort study including consecutive STEMI patients registered 1998 – 2000 (n=15697) and 2004 – 2006 (n=14380) in the Register of Information and Knowledge about Swedish Heart Intensive care Admissions.

**Outcome measures:** 1. Use of EBM such as reperfusion therapy (pPCI or fibrinolysis) and evidence-based drugs at discharge. 2. In-hospital and one year mortality.

1  
2  
3  
4  
5  
6  
7  
8  
9  
10  
11  
12  
13  
14  
15  
16  
17  
18  
19  
20  
21  
22  
23  
24  
25  
26  
27  
28  
29  
30  
31  
32  
33  
34  
35  
36  
37  
38  
39  
40  
41  
42  
43  
44  
45  
46  
47  
48  
49  
50  
51  
52  
53  
54  
55  
56  
57  
58  
59  
60

**Results:** Of those who got reperfusion therapy, pPCI was the choice in 9% in the early period compared to 68% in the late period. In the early period, reperfusion therapy was given to 63% of women vs. 71% of men,  $p < 0.001$ . Corresponding figures in the late period were 64% vs. 75%,  $p < 0.001$ . After multivariable adjustments the odds ratios [OR] (women vs. men) were 0.86 (95% CI 0.78 – 0.94) in the early and 0.80 (95% CI 0.73 – 0.89) in the late period. As regards evidence-based secondary preventive drugs at discharge in hospital survivors (platelet inhibitors, statins, ACE-inhibitors/angiotensin receptor blockers [ARB] and beta-blockers) there were small gender differences in the early period. In the late period women had 14 – 25% less chance of receiving these drugs, OR 0.75 (95% CI 0.68 – 0.81) thru 0.86 (95% CI 0.77 – 0.95). In both periods, multivariable adjusted in-hospital mortality was higher in women, OR 1.18 (95% CI 1.02 – 1.36) and 1.21 (1.00 – 1.46). One year mortality was gender equal, HR 0.95 (95% CI 0.87– 1.05) and 0.96 (0.86 – 1.08), after adding EBM to the multivariable adjustments.

**Conclusion:** In spite of an intense gender debate, focus on guideline adherence and the change in reperfusion strategy the last decade gender differences in use of reperfusion therapy and evidence-based therapy at discharge did not decline during the study period, rather the opposite. Moreover, higher mortality in women persisted.

## INTRODUCTION

1  
2  
3 Numerous studies have shown excess mortality in women after myocardial infarction [MI][1, 2] but ST-  
4 elevation MI [STEMI] has seldom been separated from non-ST elevation acute coronary syndromes  
5 [NSTEACS].[1, 3] Women have been treated less intensively than men [4, 5] with less reperfusion therapy  
6  
7 in the STEMI group.[5] Whereas some have found small gender differences in treatment not affecting  
8  
9 mortality after MI [3] others have attributed part of the gender gap in outcome to a treatment bias.[1] Higher  
10  
11 risk of death and bleeding in women is shown in many fibrinolytic trials. [2, 6] The last decade there has  
12  
13 been a shift in reperfusion strategy in Sweden from fibrinolytic to primary PCI. Simultaneously there has  
14  
15 been an increase in use of evidence-based cardiovascular secondary preventive drugs such as statins,  
16  
17 P2Y12-inhibitors and ACE-inhibitors/angiotensin receptor blockers [ARBs] and the case fatality has  
18  
19 declined. There is less firm evidence that female gender is an independent risk factor for adverse outcome  
20  
21 after primary percutaneous coronary intervention [pPCI] which seems to be a better reperfusion strategy for  
22  
23 women in particular.[7, 8, 9, 10] Since 2002/2003 there are separate ESC guidelines for STEMI and NSTE  
24  
25 ACS recommending pPCI as the preferred reperfusion strategy in STEMI.[11, 12] With the last decade's  
26  
27 awareness and debate about ACS from a gender perspective, the focus on adherence to treatment guidelines,  
28  
29 and the shift to a reperfusion strategy, we hypothesised that the previously noticed gender differences in  
30  
31 STEMI management would have decreased and thus also the gender gap in mortality, especially in the early  
32  
33 phase.  
34  
35  
36  
37  
38  
39

40 Our aim was to evaluate gender differences in management and outcome in STEMI patients in two time  
41  
42 periods with different dominating reperfusion strategies, i.e. fibrinolytics and primary PCI, respectively.  
43  
44  
45

## METHODS

### Patients

46  
47  
48 Data for this study came from the prospective observational Register of Information and Knowledge about  
49  
50 Swedish Heart Intensive care Admissions [RIKS-HIA], since 2009 merged with the Swedish Coronary  
51  
52 Angiography and Angioplasty Registry [SCAAR], the Swedish Heart Surgery Registry and the National  
53  
54  
55  
56  
57  
58  
59  
60

1  
2  
3  
4  
5  
6  
7  
8  
9  
10  
11  
12  
13  
14  
15  
16  
17  
18  
19  
20  
21  
22  
23  
24  
25  
26  
27  
28  
29  
30  
31  
32

Registry of Secondary Prevention [SEPHIA] together forming the Swedish Web-system for Enhancement and Development of Evidence-based care in Heart disease Evaluated According to Recommended Therapies [SWEDEHEART].[13] The RIK-SHIA/SWEDEHEART register is a large national quality register funded by the National Board of Health and Welfare (Socialstyrelsen). It contains information about all patients admitted to coronary care units [CCU] of the participating hospitals in Sweden (95% of the CCUs in Sweden year 2004). Variables including age, sex, smoking habits, co-morbidity, delay-times, symptoms, biochemical markers, results from cardiac investigations, complications, revascularisation procedures, therapies, discharge diagnoses and outcomes during the hospital stay are continuously recorded on-line over the internet. The criteria for the MI diagnosis were standardised and identical for all participating hospitals.[14, 15] The register has a continuous internal and external validation of data. The internet-based program for data input has interactive instructions, manuals, definitions and help functions and a number of compulsory variables and inbuilt validity controls. An independent monitor travels to 20 hospitals annually and in each hospital 30 randomly chosen patients in the database are compared with the hospital records. For example year 2005, 95.2% and 2006, 96.5% of the registry input showed agreement with the hospital records.

33  
34  
35  
36  
37  
38  
39  
40  
41  
42  
43  
44  
45  
46  
47  
48  
49  
50  
51  
52  
53  
54  
55  
56  
57  
58  
59  
60

RIKS-HIA/SWEDEHEART is repeatedly further merged with the administrative registers National Cause of Death register and the National Patient Register (National Board of Health and Welfare is responsible for both those registers). The Cause of Death Register covers all Swedish residents, whether the death occurred in Sweden or not, and whether the person in question was a Swedish citizen or not. From this register information was available about cause of death and vital status of all Swedish citizens until 31<sup>st</sup> of December 2007. Regarding co-morbidity, data on previous diagnoses of diabetes, hypertension, MI and previous revascularisation procedures were taken from RIKS-HIA, SCAAR and the Swedish Heart Surgery Registry, which were merged (today SWEDEHEART). Previous history of co-morbidities such as chronic obstructive pulmonary disease [COPD], heart failure, chronic kidney disease [CKD], peripheral artery disease [PAD], dementia and cancer was obtained from the National Patient Register, including patients hospitalised in Sweden since 1987. Information on previous history of heart failure or stroke was taken both from



1 RIKSHIA and the National Patient Register. A patient was coded as having the diagnosis if he/she had the  
2 diagnosis in either of these registries.  
3

4 Between 1st January 1995 until 31st December 2006, 54146 patients were admitted to participating CCUs  
5 with the first registry recorded diagnosis of STEMI, defined as ST-elevation on admission ECG and a  
6 diagnosis of acute MI at discharge. Patients with pacemaker/unknown/unspecified rhythm or bundle branch  
7 block on admission were excluded. Two time periods with different dominating reperfusion strategies were  
8 chosen (Figure 1); patients admitted 1st of January 1998 until 31st of December 2000 (the early period) and  
9 patients admitted 1st of January 2004 until 31st of December 2006 (the late period). The yearly STEMI  
10 prevalence was similar and about 5000 (women comprising 33-36%) ranging from 4662 (year 2006) to 5308  
11 (year 2000). The groups were compared and gender comparisons were done in both groups.  
12  
13  
14  
15  
16  
17  
18  
19  
20  
21  
22  
23

## 24 **Statistical analyses**

25 Continuous variables were summarised by their mean and standard deviation or median and interquartile  
26 range as appropriate. Categorical variables were summarised by counts and percentages. Comparisons  
27 between different strata were performed by chi-square tests for categorical variables and by student t-tests or  
28 Mann Whitney tests for continuous variables. P-values < 0.05 were considered to indicate statistical  
29 significance.  
30  
31  
32  
33  
34  
35  
36

37 Crude, age- and multivariable adjusted odds ratios with 95% confidence intervals were calculated from  
38 logistic regression analyses in order to compare the genders regarding use of cardiac procedures, evidence  
39 based therapies at discharge and in-hospital mortality. In addition to sex and age, the multivariable adjusted  
40 analyses included smoking, previous MI, PCI, coronary artery bypass grafting [CABG], stroke,  
41 hypertension, diabetes mellitus, COPD, heart failure, CKD, PAD, dementia, cancer within 3 years, therapies  
42 on arrival, interventional hospital and year of inclusion. Regarding use of coronary angiography, reperfusion  
43 therapy and in-hospital mortality we also added Killip class on arrival and symptom-to-door time (as a  
44 continuous variable in one hour intervals) to the multivariable adjusted analyses. Data from the logistic  
45 regression analyses are shown in forest plots.  
46  
47  
48  
49  
50  
51  
52  
53  
54  
55  
56  
57  
58  
59  
60

1 Hazard ratios with 95% confidence intervals were calculated from Cox proportional hazard regression  
2 analyses in order to compare the genders regarding cumulative one year mortality. The first multivariable  
3 adjusted analysis included the same variables as first described above. In a second multivariable adjusted  
4 analysis we also added reperfusion therapy and evidence-based therapies at discharge (platelet inhibitors,  
5 beta-blockers, ACE-inhibitors/ARBs and statins). Data from the Cox regression analyses are shown in forest  
6 plots.  
7  
8

9  
10  
11  
12  
13 Missing values for all variables were controlled (1-2 %). As symptom-to-door time was available for 82 %  
14 of the patients a sensitivity analysis was done. Logistic regression analyses regarding use of coronary  
15 angiography, reperfusion therapy and in-hospital mortality were done also without incorporating symptom-  
16 to-door time. These analyses did not substantially change the results. (Supplementary table)  
17  
18  
19

20  
21  
22 All statistical analyses were performed with the SPSS (PASW Statistics) Version 18.0 software (SPSS, Inc,  
23 Chicago, Ill).  
24  
25  
26  
27

## 28 29 **Ethical considerations**

30  
31 The register was approved by the National Board of Health and Welfare and the process of merging the  
32 RIKS-HIA register with other registries was approved by the Swedish Data Inspection Board. The study was  
33 approved by the ethical committee and complies with the Declaration of Helsinki.  
34  
35  
36  
37  
38  
39

## 40 41 **RESULTS**

### 42 43 **Baseline characteristics**

44  
45 A total of 30 077 STEMI patients were admitted during the two inclusion periods, 15 697 (35% women) in  
46 1998-2000 and 14 380 (35% women) in 2004-2006. The mean age did not differ between the two periods  
47 whereas the prevalence of previous MI was lower and the prevalence of COPD and smoking was higher in  
48 the late period. In both time periods women were 6.5 years older than men and had more often diabetes,  
49 hypertension, heart failure, COPD, PAD or previous stroke whereas men were more often smokers and were  
50 previously revascularised.  
51  
52  
53  
54  
55  
56  
57  
58  
59  
60

1 The use of statins, clopidogrel and ACE-inhibitors/ARB on admission increased between the two time  
2 periods. Women were more frequently treated with diuretics, digitalis, calcium-channel blocker and long-  
3 acting nitrates on admission in both time periods,.  
4

5  
6 Women had 30 min longer median symptom-to-door time in both time periods. Also the median time from  
7  
8 1<sup>st</sup> ECG to needle differed between the genders in both time periods (4 and 5 min respectively), whereas the  
9  
10 median time from 1<sup>st</sup> ECG to balloon only differed in the late time period (5 min). (Table I)  
11  
12

### 13 14 15 **Hospital care**

16  
17 In the early period, coronary angiography was performed in fewer women than men (18 vs. 25%). In the late  
18  
19 period the numbers were higher in both genders (66 vs. 82%). (Table I) After multivariable adjustments  
20  
21 women had 8 vs. 20% less chance of angiography in early and late periods, respectively (odds ratio [OR]  
22  
23 0.92, 95% confidence interval [CI] 0.83 – 1.02 vs. OR 0.80, 95% CI 0.71 – 0.90). (Figure 2, Supplementary  
24  
25 table) Among patients treated with reperfusion therapy 9% (7% of women, 10% of men, Table 1) were  
26  
27 treated with pPCI in the early compared to 68% (64% of women, 69% of men, Table 1) in the late period.  
28  
29 Sixty-three percent of women compared to 71% of men received acute reperfusion therapy in the early  
30  
31 compared to 64% and 75% in the late period. (Table II) After multivariable adjustment, women were 14 and  
32  
33 20% less likely to receive reperfusion therapy in the early and late periods, respectively, compared to men  
34  
35 (OR 0.86, 95% CI 0.78 – 0.94 vs. OR 0.80, 95% CI 0.73 – 0.89). (Figure 2, Supplementary table) Patients in  
36  
37 the early period had more often heart failure and lower Killip class but less major bleedings. In both early  
38  
39 and late period, women had more often heart failure and bleeding complications during hospital stay. (Table  
40  
41  
42  
43  
44  
45 I)

### 46 47 48 **Therapy at discharge**

49  
50 Evidence-based treatment with statins, platelet inhibitors, beta-blockers and ACE-inhibitors or ARBs were  
51  
52 prescribed more often in the late compared to the early period in both genders. All evidence-based therapies  
53  
54 were prescribed more seldom to women in both periods. (Table I) Women still had less chance of receiving  
55  
56  
57  
58  
59  
60

1 ACE-inhibitors/ARBs but higher chance of receiving statins after multivariable adjustments in the early  
2 period. In the late period women had 14 – 25% less chance of receiving any of these therapies after  
3 multivariable adjustments, OR 0.75, (95% CI 0.68 – 0.81) thru OR 0.86 (95% CI 0.73 – 1.00). (Figure 2,  
4 Supplementary table)  
5  
6  
7  
8  
9

## 10 **Mortality**

11 In-hospital as well as cumulative one year mortality was higher in the early than in the late period in both  
12 genders. Women had about twice as high in-hospital as well as one year mortality in both periods. (Table I)  
13 After multivariable adjustments the in-hospital mortality was around 20% higher in women in both periods  
14 (OR 1.17, 95% CI 1.02 – 1.36 vs. OR 1.21, 95% CI 1.00 – 1.46). The one year mortality was 5 and 11%  
15 higher in women in the early and late period respectively, although it did not reach statistical significance in  
16 the early period (hazard ratio [HR] 1.05, 95% CI 0.97-1.14 vs. HR 1.11, 95% CI 1.00 – 1.24). After adding  
17 adjustment for reperfusion therapy and evidence-based treatment at discharge, there was no longer any  
18 gender difference in long-term mortality (HR 0.95, 95% CI 0.87 – 1.05 vs. HR 0.96, 95% CI 0.86 – 1.08).  
19 (Figure 3, Supplementary table)  
20  
21  
22  
23  
24  
25  
26  
27  
28  
29  
30  
31  
32  
33  
34  
35

## 36 **DISCUSSION**

37 After the reperfusion strategy change patients admitted during the first decade of the 21st century were  
38 treated with reperfusion therapy more often than patients admitted during the late 1990s. Anyhow, we did  
39 not find a diminished gender gap neither regarding use of reperfusion therapy, nor regarding mortality. Even  
40 more surprising was the finding that women had 14-25% less chance of receiving evidence-based  
41 cardiovascular treatment in the late period after multivariable adjustments.  
42  
43  
44  
45  
46  
47  
48  
49  
50

51 Previous trials during the fibrinolytic era have found higher mortality in women, but usually without  
52 separating STEMI from NSTEMI ACS.[1] In STEMI studies, the risk of early death has been 10-25% higher in  
53 women after multivariable adjustments [2, 5, 6, 16] although most STEMI-cohorts have been extracted from  
54  
55  
56  
57  
58  
59  
60

1 randomised controlled trials [2, 6] and may not correspond to the real life population. Fibrinolytics has been  
2 given to fewer women even if eligibility has been considered.[17] Also in our study women had 14% lower  
3 chance of receiving reperfusion therapy in the early group where fibrinolytics accounted for 91% of the  
4 reperfusion therapy. As an increased risk of intracranial haemorrhage and other major bleedings has been  
5 found in women treated with fibrinolytics,[18] a fear of these dreadful complications may explain some of  
6 the observed difference. The well-known longer delay-times in women could be another explanation. In our  
7 study women had 30 min longer delay times from symptom onset to arrival to CCU or the cath lab in both  
8 time periods. Adjusting for this did not change the results.

9  
10  
11  
12  
13  
14  
15  
16  
17  
18 As primary PCI has been shown superior to fibrinolytics in reducing mortality after STEMI,[19] it has been  
19 recommend in the ESC guidelines since 2003.[20] In Sweden it has been the dominant reperfusion strategy  
20 from 2004 and onwards. (Figure 1) During this new pPCI era the evidence that gender per se bears  
21 prognostic information is less firm and data is contrasting. [10, 21] When we started our study and formed  
22 our hypothesis there were only small and mainly single-centre studies published.[7, 8, 10, 21] The majority  
23 of those did not find female gender to be an independent predictor of adverse outcome after pPCI.[7, 10]  
24 Mehilli et al found better myocardial salvage in women than in men after pPCI which they speculated could  
25 be due to a higher hypoxia tolerance in women because of higher incidence of pre-infarction angina  
26 (ischemic pre-conditioning) and more often spontaneous thrombolysis. [22] Also, as pPCI is less time-  
27 dependent than fibrinolytics, women could be expected to benefit more than men from a reperfusion strategy  
28 change because of their consistently longer symptom-to-door time. [10]

29  
30  
31  
32  
33  
34  
35  
36  
37  
38  
39  
40  
41  
42 Thus, our hypothesis was that the gender gap in reperfusion therapy would diminish after the shift to a  
43 reperfusion strategy that could be more advantageous to women. This hypothesis was not confirmed. The  
44 rate of reperfusion in men increased from 70.9% to 75.3% whereas the increase in women was very modest,  
45 63.1% to 63.6%. The reason for the finding is for us unclear. The gender difference in mean age was the  
46 same in the two periods and women had 30 min longer symptom-to-door time in both periods. One possible  
47 reason could be higher prevalence of normal coronary arteries in women, which is shown before although  
48 mainly in NSTEMI and mixed ACS populations.[23] In our study, during the early period we had coronary  
49  
50  
51  
52  
53  
54  
55  
56  
57  
58  
59  
60

1  
2  
3  
4  
5  
6  
7  
8  
9  
10  
11  
12  
13  
14  
15  
16  
17  
18  
19  
20  
21  
22  
23  
24  
25  
26  
27  
28  
29  
30  
31  
32  
33  
34  
35  
36  
37  
38  
39  
40  
41  
42  
43  
44  
45  
46  
47  
48  
49  
50  
51  
52  
53  
54  
55  
56  
57  
58  
59  
60

angiography findings from few patients (56% of the 3514 patients that underwent coronary angiography). In the late period we had findings on 97 % of the 11 002 examined patients showing that 3% of men and 7 % of women had non-obstructive coronary artery disease. Thus, normal coronary arteries can hardly explain the gap in reperfusion therapy in the early period when fibrinolytics was dominating and angiography seldom performed. In the late period it could account for a small part of the difference in use of primary PCI although it does not explain the gender gap in use of coronary angiography, which also increased between the two time periods.

During the last decade several important randomised controlled trials have been published encouraging more effective secondary prevention in CAD patients.[24, 25] Use of ACE-inhibitors/ARBs, dual platelet inhibition and statins has thus increased dramatically in the STEMI population during this decade and mortality has declined. We found increased use of all secondary prevention drugs, even those with older evidence such as aspirin and beta-blockers. However, the increase of all the evidence-based therapies was more pronounced in men than in women. In spite of the intense focus on the gender aspect in the ACS field during the last two decades, together with the focus on adherence to guidelines, the treatment gap was even more pronounced in the late compared to the early group. Even after multivariable adjustment, women had 14-25% lesser chance of receiving any of these drugs at discharge.

We cannot fully explain this gender gap in management. Maybe a fear of doing harm because of the well-known higher risk of bleeding in women [26] or reports from patients of previous or current adverse effects are reasons for the bias. It has been shown in previous studies that women report side effects more often than men, especially if the same dosages are used. [27] Finally, we could speculate that doctors tend to adapt to new treatment modalities and new guidelines faster in men than in women, especially in older cohorts. We did some subgroup analyses of different age groups (not included in the manuscript) where we found the treatment bias clearest in the oldest cohort.

1 A more effective reperfusion strategy with pPCI and the increased use of evidence-based treatment has been  
2 associated with improved outcome. Thus we found reduced mortality in the late compared to the early  
3 period in both genders. However we also found a persistent gender gap both regarding short- and long-term  
4 mortality. In-hospital mortality was approximately 20% higher in both time periods consistent with previous  
5 STEMI studies focusing on gender from the fibrinolytic era.[2, 5, 6, 16] From the PCI era, two recent  
6 publications by Benamer et al and Sadowski et al found that there is still a gender difference in in-hospital  
7 mortality among STEMI patients consistent with our findings. [28, 29] In addition, one year mortality was  
8 higher in our study, 5 vs. 11% higher in the early and late periods, respectively. If we also incorporated  
9 evidence-based treatment at discharge and reperfusion therapy in the multivariable adjustments, there was  
10 no longer a significant gender difference in long-term mortality.  
11

12 In USA, the American College of Cardiology's AMI Guidelines Applied in Practice (GAP) program is  
13 proven to increase the use of evidenced based medicine and reduce MI mortality but is less used in  
14 women.[30] The results in our study are in concordance with those findings.  
15  
16  
17  
18  
19  
20  
21

## 22 Limitations

23 As in all registries on clinical practice, one limitation is the handling of missing data. In the RIKS-HIA  
24 register, we have data for around 95% of the patients for almost all variables that is mandatory for the  
25 hospitals to register. Furthermore, as in all observational data sets, the adjustment might be influenced by the  
26 lack of registration on some possible confounding factors in the data base e.g. non-cardiac co-morbidities,  
27 reduced kidney function and contra-indications for specific treatments. Accordingly eligibility for all  
28 treatments was not possible to ascertain, and might thus differ between the genders. However a strength is the  
29 large number of patients allowing adjustment for baseline differences between the compared groups.  
30  
31  
32

## 33 CONCLUSION

34 Our study showed improved management and reduced mortality in STEMI patients in the late compared to  
35 the early period. Anyhow the gender difference did not diminish between the two time periods neither  
36  
37  
38  
39  
40  
41  
42  
43  
44  
45  
46  
47  
48  
49  
50  
51  
52  
53  
54  
55  
56  
57  
58  
59  
60

1 regarding management, nor regarding early mortality. Adherence to treatment guidelines was better in men  
2 than in women and in fact the treatment gap seemed even more pronounced in the new era. There was also a  
3 persistent 20% higher risk of early mortality in women in the new pPCI era, in accordance with the  
4 fibrinolytic era. Thus a better adherence to treatment guidelines in women is mandatory as it might reduce  
5 the differences in outcome between the genders. There is also a great need of studies scrutinising the gender  
6 differences in management of STEMI in the new pPCI era.  
7  
8  
9  
10  
11  
12  
13  
14  
15  
16  
17  
18

## 19 **Acknowledgments**

20 We thank all the participating hospitals for their cooperation in contributing data to RIKS-HIA.

21 We would especially like to thank late associate professor Ulf Stenestrand at the Department of Medical and  
22 Health Sciences, Division of Cardiovascular Medicine, Linköping University Hospital. He, a key founder of  
23 the RIKS-HIA register, helped in the preparation of the database and in management, analysis and  
24 interpretation of the data.  
25  
26  
27  
28  
29  
30  
31  
32

## 33 **Funding**

34 The RIKS-HIA register (today SWEDEHEART) is supported by the National Board of Health and Welfare,  
35 the Swedish Society of Cardiology and the Swedish Association of Local Authorities and Regions. The  
36 funding sources had no role in the study such as being involved in study design, data collection, analysis and  
37 interpretation of data or in manuscript writing.  
38  
39  
40  
41  
42  
43  
44

## 45 **Disclosures**

46 None.

## 47 **Funding**

48 SWEDEHEART/RIKS-HIA is supported by the National Board of Health and Welfare, The Swedish  
49 Association of Local Authorities and Regions and the Swedish Society of Cardiology. This particular  
50 reserach have no funder.  
51  
52  
53  
54  
55  
56  
57  
58  
59  
60



## REFERENCES

- 1 Milcent C, Dormont B, Durand-Zaleski I, et al. Gender differences in hospital mortality and use of percutaneous coronary intervention in acute myocardial infarction: microsimulation analysis of the 1999 nationwide French hospitals database. *Circulation* 2007;**115**:833-9.
- 2 Mega JL, Morrow DA, Ostor E, et al. Outcomes and optimal antithrombotic therapy in women undergoing fibrinolysis for ST-elevation myocardial infarction. *Circulation* 2007;**115**:2822-8.
- 3 Gan SC, Beaver SK, Houck PM, et al. Treatment of acute myocardial infarction and 30-day mortality among women and men. *N Engl J Med* 2000;**343**:8-15.
- 4 Bugiardini R, Yan AT, Yan RT, et al. Factors influencing underutilization of evidence-based therapies in women. *Eur Heart J* 2011;**11**:1337-44.
- 5 Jneid H, Fonarow GC, Cannon CP, et al. Sex differences in medical care and early death after acute myocardial infarction. *Circulation* 2008;**118**:2803-10.
- 6 Berger JS, Elliott L, Gallup D, et al. Sex differences in mortality following acute coronary syndromes. *Jama* 2009;**302**:874-82.
- 7 De Luca G, Gibson CM, Gyongyosi M, et al. Gender-related differences in outcome after ST-segment elevation myocardial infarction treated by primary angioplasty and glycoprotein IIb/IIIa inhibitors: insights from the EGYPT cooperation. *J Thromb Thrombolysis* 2010;**30**:342-6.
- 8 Antoniucci D, Valenti R, Moschi G, et al. Sex-based differences in clinical and angiographic outcomes after primary angioplasty or stenting for acute myocardial infarction. *Am J Cardiol* 2001;**87**:289-93.
- 9 De Luca G, Suryapranata H, Dambrink JH, et al. Sex-related differences in outcome after ST-segment elevation myocardial infarction treated by primary angioplasty: data from the Zwolle Myocardial Infarction study. *Am Heart J* 2004;**148**:852-6.
- 10 Motovska Z, Widimsky P, Aschermann M. The impact of gender on outcomes of patients with ST elevation myocardial infarction transported for percutaneous coronary intervention: analysis of the PRAGUE-1 and 2 studies. *Heart* 2008;**94**:e5.
- 11 Bassand JP, Hamm CW, Ardissino D, et al. Guidelines for the diagnosis and treatment of non-ST-segment elevation acute coronary syndromes. The Task Force for the Diagnosis and Treatment of Non-ST-Segment Elevation Acute Coronary Syndromes of the European Society of Cardiology. *Eur Heart J* 2007;**28**:1598-660.

- 12 Van de Werf F, Bax J, Betriu A, et al. Management of acute myocardial infarction in patients presenting with persistent  
1 ST-segment elevation: the Task Force on the Management of ST-Segment Elevation Acute Myocardial Infarction of the European  
2 Society of Cardiology. *Eur Heart J* 2008;**29**:2909-45.  
3  
4  
5  
6 13 Jernberg T, Attebring MF, Hambræus K, et al. The Swedish Web-system for enhancement and development of evidence-  
7 based care in heart disease evaluated according to recommended therapies (SWEDEHEART). *Heart* 2010;**96**:1617-21.  
8  
9  
10 14 Tunstall-Pedoe H, Kuulasmaa K, Amouyel P, et al. Myocardial infarction and coronary deaths in the World Health  
11 Organization MONICA Project. Registration procedures, event rates, and case-fatality rates in 38 populations from 21 countries  
12 in four continents. *Circulation* 1994;**90**:583-612.  
13  
14  
15 15 Alpert JS, Thygesen K, Antman E, et al. Myocardial infarction redefined--a consensus document of The Joint European  
16 Society of Cardiology/American College of Cardiology Committee for the redefinition of myocardial infarction. *J Am Coll Cardiol*  
17 2000;**36**:959-69.  
18  
19  
20 21  
22 16 Champney KP, Frederick PD, Bueno H, et al. The joint contribution of sex, age and type of myocardial infarction on  
23 hospital mortality following acute myocardial infarction. *Heart* 2009;**95**:895-9.  
24  
25  
26 17 Eagle KA, Goodman SG, Avezum A, et al. Practice variation and missed opportunities for reperfusion in ST-segment-  
27 elevation myocardial infarction: findings from the Global Registry of Acute Coronary Events (GRACE). *Lancet* 2002;**359**:373-7.  
28  
29  
30 18 Reynolds HR, Farkouh ME, Lincoff AM, et al. Impact of female sex on death and bleeding after fibrinolytic treatment of  
31 myocardial infarction in GUSTO V. *Arch Intern Med* 2007;**167**:2054-60.  
32  
33  
34 19 Keeley EC, Boura JA, Grines CL. Primary angioplasty versus intravenous thrombolytic therapy for acute myocardial  
35 infarction: a quantitative review of 23 randomised trials. *Lancet* 2003;**361**:13-20.  
36  
37  
38 20 Van de Werf F, Ardissino D, Betriu A, et al. Management of acute myocardial infarction in patients presenting with ST-  
39 segment elevation. The Task Force on the Management of Acute Myocardial Infarction of the European Society of Cardiology.  
40 *Eur Heart J* 2003;**24**:28-66.  
41  
42  
43 21 Vakili BA, Kaplan RC, Brown DL. Sex-based differences in early mortality of patients undergoing primary angioplasty for  
44 first acute myocardial infarction. *Circulation* 2001;**104**:3034-8.  
45  
46  
47 22 Mehilli J, Ndrepepa G, Kastrati A, et al. Gender and myocardial salvage after reperfusion treatment in acute myocardial  
48 infarction. *J Am Coll Cardiol* 2005;**45**:828-31.  
49  
50  
51 23 Larsen AI, Galbraith PD, Ghali WA, et al. Characteristics and outcomes of patients with acute myocardial infarction and  
52 angiographically normal coronary arteries. *Am J Cardiol* 2005;**95**:261-3.  
53  
54  
55 24 Yusuf S, Zhao F, Mehta SR, et al. Effects of clopidogrel in addition to aspirin in patients with acute coronary syndromes  
56 without ST-segment elevation. *N Engl J Med* 2001;**345**:494-502.  
57  
58  
59  
60

- 1  
2  
3  
4  
5  
6  
7  
8  
9  
10  
11  
12  
13  
14  
15  
16  
17  
18  
19  
20  
21  
22  
23  
24  
25  
26  
27  
28  
29  
30  
31  
32  
33  
34  
35  
36  
37  
38  
39  
40  
41  
42  
43  
44  
45  
46  
47  
48  
49  
50  
51  
52  
53  
54  
55  
56  
57  
58  
59  
60
- 25 Yusuf S, Sleight P, Pogue J, et al. Effects of an angiotensin-converting-enzyme inhibitor, ramipril, on cardiovascular events in high-risk patients. The Heart Outcomes Prevention Evaluation Study Investigators. *N Engl J Med* 2000;**342**:145-53.
- 26 Manoukian SV. Predictors and impact of bleeding complications in percutaneous coronary intervention, acute coronary syndromes, and ST-segment elevation myocardial infarction. *Am J Cardiol* 2009;**104**:9C-15C.
- 27 Oertelt-Prigione S, Regitz-Zagrosek V. Gender aspects in cardiovascular pharmacology. *J Cardiovasc Transl Res* 2009;**2**:258-66.
- 28 Sadowski M, Gasior M, Gierlotka M, et al. Gender-related differences in mortality after ST-segment elevation myocardial infarction: a large multicentre national registry. *EuroIntervention* 2011;**6**:1068-72.
- 29 Benamer H, Tafflet M, Bataille S, et al. Female gender is an independent predictor of in-hospital mortality after STEMI in the era of primary PCI: insights from the greater Paris area PCI Registry. *EuroIntervention* 2011;**6**:1073-9.
- 30 Jani SM, Montoye C, Mehta R, et al. Sex differences in the application of evidence-based therapies for the treatment of acute myocardial infarction: the American College of Cardiology's Guidelines Applied in Practice projects in Michigan. *Arch Intern Med* 2006;**166**:1164-70.

TABLE I Baseline characteristics, management and outcome

|                                                            | Early period: Year 1998-2000 |                    |         | Late period: Year 2004-2006 |                    |         | Periods compared<br>p-value |
|------------------------------------------------------------|------------------------------|--------------------|---------|-----------------------------|--------------------|---------|-----------------------------|
|                                                            | Men<br>(n=10151)             | Women<br>(n=5546)  | p-value | Men<br>(n=9386)             | Women<br>(n=4994)  | p-value |                             |
| Age, in years (standard deviations)                        | 66.4 (12.2)                  | 72.9 (11.5)        | <0.001  | 65.9 (12.2)                 | 72.4 (12.1)        | <0.001  | 0.11                        |
| Median symptom-to-door time, h:m (IQR)                     | 2:45 (1:39 – 5:10)           | 3:15 (1:54 – 6:15) | <0.001  | 3:00 (1:40 – 5:50)          | 3:30 (2:00 – 6:30) | <0.001  | <0.001‡                     |
| Median time from 1 <sup>st</sup> ECG to balloon, h:m (IQR) | 1:00 (0:35 – 1:39)           | 0:58 (0:35 – 1:42) | 0.60    | 1:10 (0:42 – 1:49)          | 1:15 (0:45 – 1:59) | <0.001  | <0.001                      |
| Median time from 1 <sup>st</sup> ECG to needle, h:m (IQR)  | 0:43 (0:27 – 1:05)           | 0:47 (0:30 – 1:15) | <0.001  | 0:36 (0:20 – 1:02)          | 0:41 (0:23 – 1:08) | 0.001   | <0.001                      |
| <b>Co-morbidity</b>                                        |                              |                    |         |                             |                    |         |                             |
| Current smoker                                             | 2762 (28.9)                  | 1220 (23.8)        | <0.001  | 2680 (30.9)                 | 1224 (27.6)        | <0.001  | <0.001‡                     |
| Previous myocardial infarction                             | 1781 (17.5)                  | 742 (13.4)         | <0.001  | 1062 (11.3)                 | 529 (10.6)         | 0.19    | <0.001‡                     |
| Previous PCI                                               | 287 (2.9)                    | 87 (1.6)           | <0.001  | 372 (4.0)                   | 110 (2.2)          | <0.001  | <0.001‡                     |
| Previous coronary artery bypass grafting                   | 307 (3.1)                    | 58 (1.1)           | <0.001  | 308 (3.3)                   | 82 (1.7)           | <0.001  | 0.05 ‡                      |
| Diabetes Mellitus                                          | 1758 (17.3)                  | 1198 (21.6)        | <0.001  | 1679 (17.9)                 | 1014 (20.3)        | <0.001  | 0.82                        |
| Hypertension                                               | 2736 (27.2)                  | 1972 (36.0)        | <0.001  | 3053 (32.8)                 | 2195 (44.5)        | <0.001  | <0.001‡                     |
| Congestive heart failure                                   | 586 (5.8)                    | 518 (9.3)          | <0.001  | 406 (4.3)                   | 455 (9.1)          | <0.001  | <0.001‡                     |
| Previous stroke                                            | 769 (7.6)                    | 509 (9.2)          | <0.001  | 780 (8.3)                   | 523 (10.5)         | <0.001  | 0.04‡                       |
| Chronic kidney disease                                     | 89 (0.9)                     | 40 (0.7)           | 0.30    | 113 (1.2)                   | 72 (1.4)           | <0.001  | <0.001‡                     |
| Chronic obstructive pulmonary disease                      | 448 (4.4)                    | 358 (6.5)          | <0.001  | 465 (5.0)                   | 440 (8.8)          | <0.001  | <0.001‡                     |
| Cancer within 3 years                                      | 246 (2.4)                    | 160 (2.9)          | 0.08    | 277 (3.0)                   | 149 (3.0)          | 0.91    | 0.05‡                       |
| <b>Therapy on arrival</b>                                  |                              |                    |         |                             |                    |         |                             |
| Aspirin                                                    | 2680 (26.6)                  | 1512 (27.5)        | 0.25    | 2127 (22.9)                 | 1440 (29.2)        | <0.001  | <0.001‡                     |
| Other platelet inhibitor                                   | 37 (0.4)                     | 16 (0.3)           | 0.43    | 309 (3.3)                   | 195 (3.9)          | 0.05    | <0.001‡                     |
| Beta-blocker                                               | 2525 (25.1)                  | 1544 (28.1)        | <0.001  | 2194 (23.6)                 | 1565 (31.8)        | <0.001  | 0.57                        |
| ACE inhibitor/ARB                                          | 1081 (10.7)                  | 586 (10.7)         | 0.89    | 1553 (16.7)                 | 924 (18.7)         | 0.002   | <0.001‡                     |
| Statin                                                     | 750 (7.5)                    | 318 (5.8)          | <0.001  | 1249 (13.4)                 | 621 (12.6)         | 0.16    | <0.001‡                     |
| Oral anticoagulant                                         | 271 (2.7)                    | 109 (2.0)          | 0.006   | 232 (2.5)                   | 119 (2.4)          | 0.76    | 0.91                        |
| Calcium-channel blocker                                    | 1304 (13.0)                  | 786 (14.3)         | 0.02    | 1075 (11.6)                 | 722 (14.6)         | <0.001  | 0.04‡                       |
| Diuretics                                                  | 1453 (14.4)                  | 1520 (27.7)        | <0.001  | 1182 (12.7)                 | 1407 (28.5)        | <0.001  | 0.04‡                       |
| Digitalis                                                  | 388 (3.9)                    | 343 (6.3)          | <0.001  | 156 (1.7)                   | 214 (4.3)          | <0.001  | <0.001‡                     |
| Long-acting nitrates                                       | 1053 (10.5)                  | 679 (12.4)         | <0.001  | 487 (5.2)                   | 435 (8.8)          | <0.001  | <0.001‡                     |
| <b>CCU procedures and therapies</b>                        |                              |                    |         |                             |                    |         |                             |
| Echocardiography                                           | 6200 (64.2)                  | 2970 (57.8)        | <0.001  | 6842 (73.7)                 | 3282 (66.5)        | <0.001  | <0.001‡                     |
| Coronary angiography                                       | 2539 (25.0)                  | 975 (17.6)         | <0.001  | 7686 (81.9)                 | 3316 (66.4)        | <0.001  | <0.001‡                     |
| Reperfusion therapy, all                                   | 7194 (70.9)                  | 3500 (63.1)        | <0.001  | 7065 (75.3)                 | 3174 (63.6)        | <0.001  | <0.001‡                     |
| Fibrinolysis (% of all patients)                           | 6419 (63.3)                  | 3223 (58.2)        | <0.001  | 1944 (21.0)                 | 1006 (20.4)        | 0.44    | <0.001‡                     |
| Fibrinolysis (% of patients receiving reperfusion therapy) | 6419 (89.3)                  | 3223 (92.2)        | <0.001  | 1944 (28.0)                 | 1006 (32.4)        | <0.001  | <0.001                      |
| Primary PCI (% of all patients)                            | 713 (7.0)                    | 248 (4.5)          | <0.001  | 4898 (52.2)                 | 2033 (40.7)        | <0.001  | <0.001‡                     |
| Primary PCI (% of patients receiving reperfusion therapy)  | 713 (9.9)                    | 248 (7.1)          | <0.001  | 4898 (69.3)                 | 2033 (64.1)        | <0.001  | <0.001                      |
| <b>Complications</b>                                       |                              |                    |         |                             |                    |         |                             |
| Killip class II-IV                                         | 2912 (29.5)                  | 2077 (38.6)        | <0.001  | 991 (11.1)                  | 847 (18.4)         | <0.001  | <0.001                      |
| Major bleeding †                                           | 67 (1.1)                     | 62 (2.0)           | <0.001  | 104 (1.6)                   | 120 (4.0)          | <0.001  | <0.001‡                     |
| Re-infarction during hospital stay                         | 281 (2.9)                    | 205 (3.9)          | 0.001   | 150 (1.6)                   | 94 (1.9)           | 0.21    | <0.001‡                     |
| <b>Therapy at discharge in hospital survivors</b>          |                              |                    |         |                             |                    |         |                             |
| Aspirin                                                    | 7994 (87.5)                  | 4004 (86.1)        | 0.02    | 8318 (93.6)                 | 4062 (91.2)        | <0.001  | <0.001‡                     |
| Other platelet inhibitor                                   | 800 (8.8)                    | 330 (7.1)          | 0.001   | 6978 (78.5)                 | 3045 (68.4)        | <0.001  | <0.001‡                     |
| Beta-blocker                                               | 7801 (85.4)                  | 3812 (82.1)        | <0.001  | 8105 (91.2)                 | 3895 (87.5)        | <0.001  | <0.001‡                     |
| ACE inhibitor/ARB                                          | 3934 (43.4)                  | 1952 (42.4)        | 0.25    | 5894 (66.4)                 | 2719 (61.1)        | <0.001  | <0.001‡                     |
| Statin                                                     | 3991 (44.0)                  | 1757 (38.1)        | <0.001  | 7570 (85.2)                 | 3279 (73.8)        | <0.001  | <0.001‡                     |
| <b>Outcome</b>                                             |                              |                    |         |                             |                    |         |                             |
| In-hospital mortality                                      | 837 (8.3)                    | 800 (14.5)         | <0.001  | 464 (4.9)                   | 521 (10.4)         | <0.001  | <0.001‡                     |
| One year mortality                                         | 1576 (15.5)                  | 1324 (23.9)        | <0.001  | 961 (10.3)                  | 955 (19.1)         | <0.001  | <0.001‡                     |

Data presented as numbers (percentages) if not otherwise indicated. †Intracranial haemorrhage, mortal bleeding or given blood transfusion in patients treated with reperfusion therapy. ‡ More in early period † More in late period  
IQR, interquartile range; PCI, percutaneous coronary intervention; ACE, angiotensin converting enzyme; ARB, angiotensin receptor blocker; CCU, coronary care unit

## Figure legends

1  
2  
3 Figure 1. Trends in reperfusion therapy among Swedish STEMI patients 1995 – 2006  
4

5 Figure 2. Use of coronary angiography, reperfusion therapy and evidence based therapies at discharge in STEMI patients in two  
6  
7 time periods after multivariable adjustments, women vs. men  
8

9  
10 Figure 3. In-hospital and cumulative one year mortality in STEMI patients in two time periods with different dominating  
11  
12 reperfusion strategies after multivariable adjustments, women vs. men  
13

14  
15  
16  
17  
18  
19  
20  
21  
22  
23  
24  
25  
26  
27  
28  
29  
30  
31  
32  
33  
34  
35  
36  
37  
38  
39  
40  
41  
42  
43  
44  
45  
46  
47  
48  
49  
50  
51  
52  
53  
54  
55  
56  
57  
58  
59  
60

For peer review only

1  
2  
3  
4  
5  
6  
7  
8  
9  
10  
11  
12  
13  
14  
15  
16  
17  
18  
19  
20  
21  
22  
23  
24  
25  
26  
27  
28  
29  
30  
31  
32  
33  
34  
35  
36  
37  
38  
39  
40  
41  
42  
43  
44  
45  
46  
47  
48  
49  
50  
51  
52  
53  
54  
55  
56  
57  
58  
59  
60



Trends in reperfusion therapy among Swedish STEMI patients 1995 – 2006  
119x180mm (300 x 300 DPI)

1  
2  
3  
4  
5  
6  
7  
8  
9  
10  
11  
12  
13  
14  
15  
16  
17  
18  
19  
20  
21  
22  
23  
24  
25  
26  
27  
28  
29  
30  
31  
32  
33  
34  
35  
36  
37  
38  
39  
40  
41  
42  
43  
44  
45  
46  
47  
48  
49  
50  
51  
52  
53  
54  
55  
56  
57  
58  
59  
60

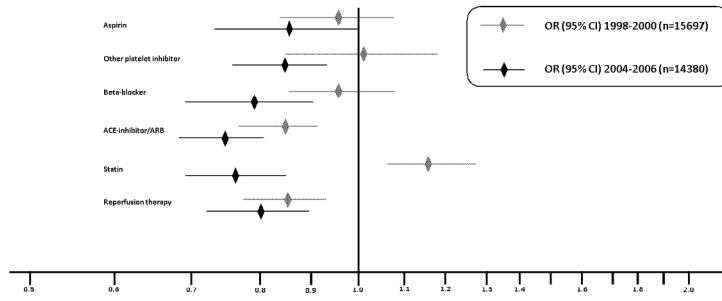

Use of coronary angiography, reperfusion therapy and evidence based therapies at discharge in STEMI patients in two time periods after multivariable adjustments, women vs. men  
180x119mm (300 x 300 DPI)

view only

1  
2  
3  
4  
5  
6  
7  
8  
9  
10  
11  
12  
13  
14  
15  
16  
17  
18  
19  
20  
21  
22  
23  
24  
25  
26  
27  
28  
29  
30  
31  
32  
33  
34  
35  
36  
37  
38  
39  
40  
41  
42  
43  
44  
45  
46  
47  
48  
49  
50  
51  
52  
53  
54  
55  
56  
57  
58  
59  
60



In-hospital and cumulative one year mortality in STEMI patients in two time periods with different dominating reperfusion strategies. Crude, age-adjusted and multivariable adjusted odds and hazard ratios with 95% confidence intervals, women vs. men  
295x190mm (120 x 120 DPI)

view only



Figure 1.

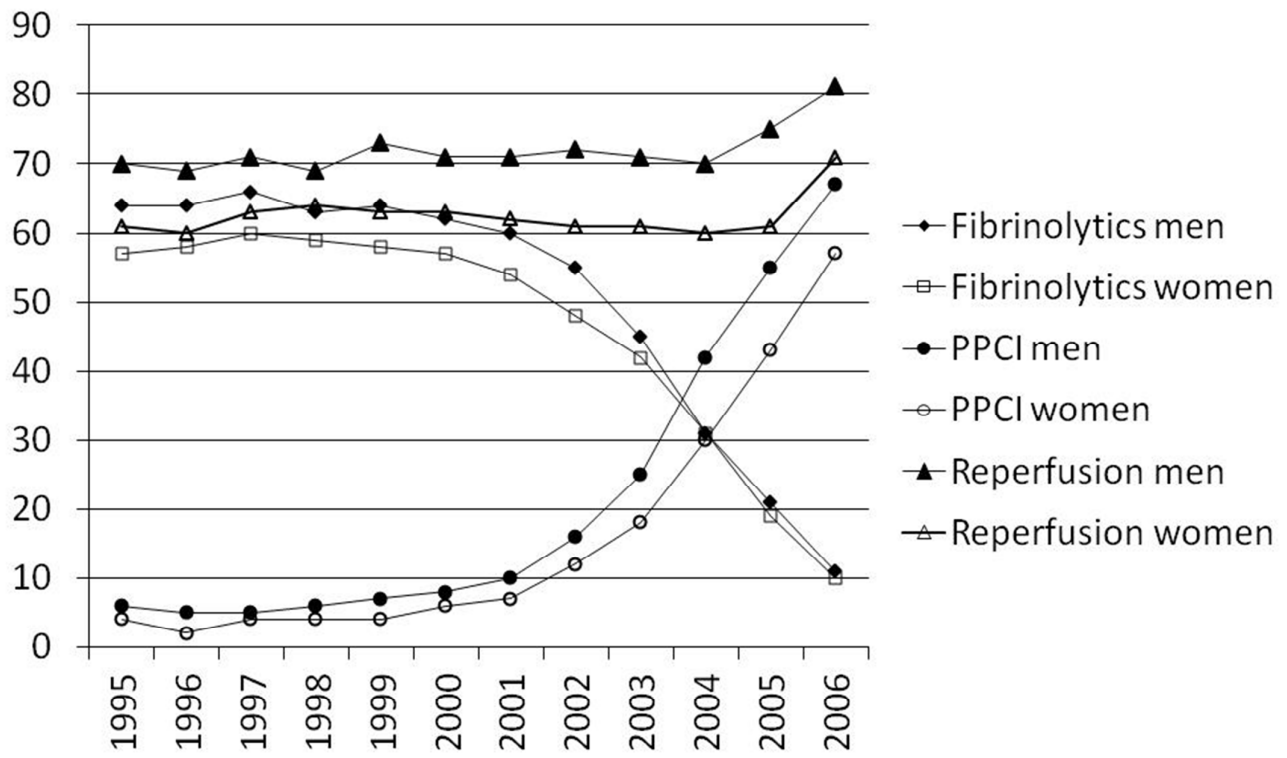

review only

Figure 2

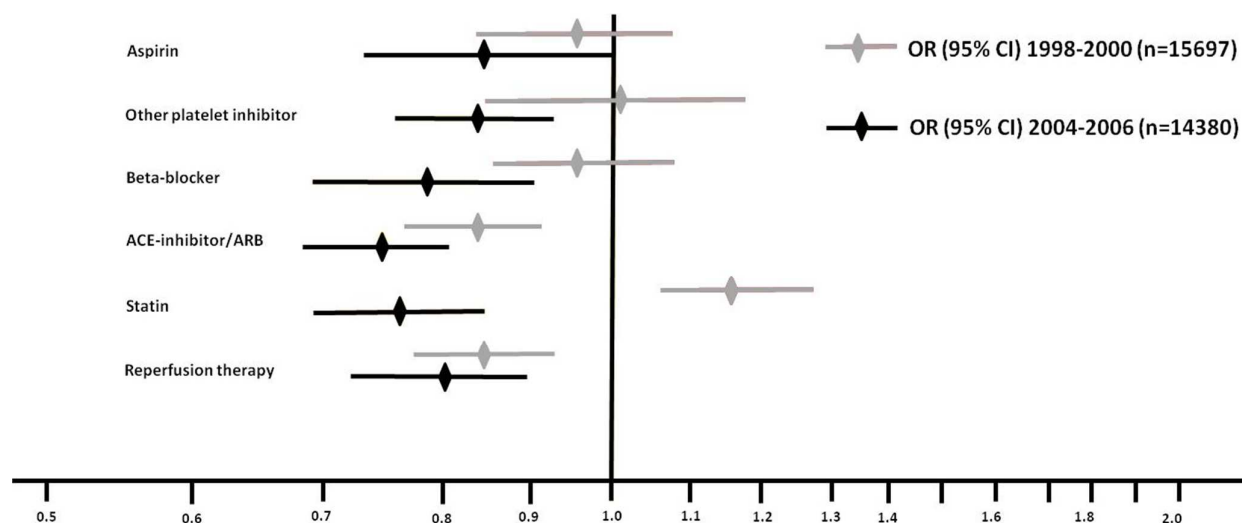

peer review only

Figure 3.

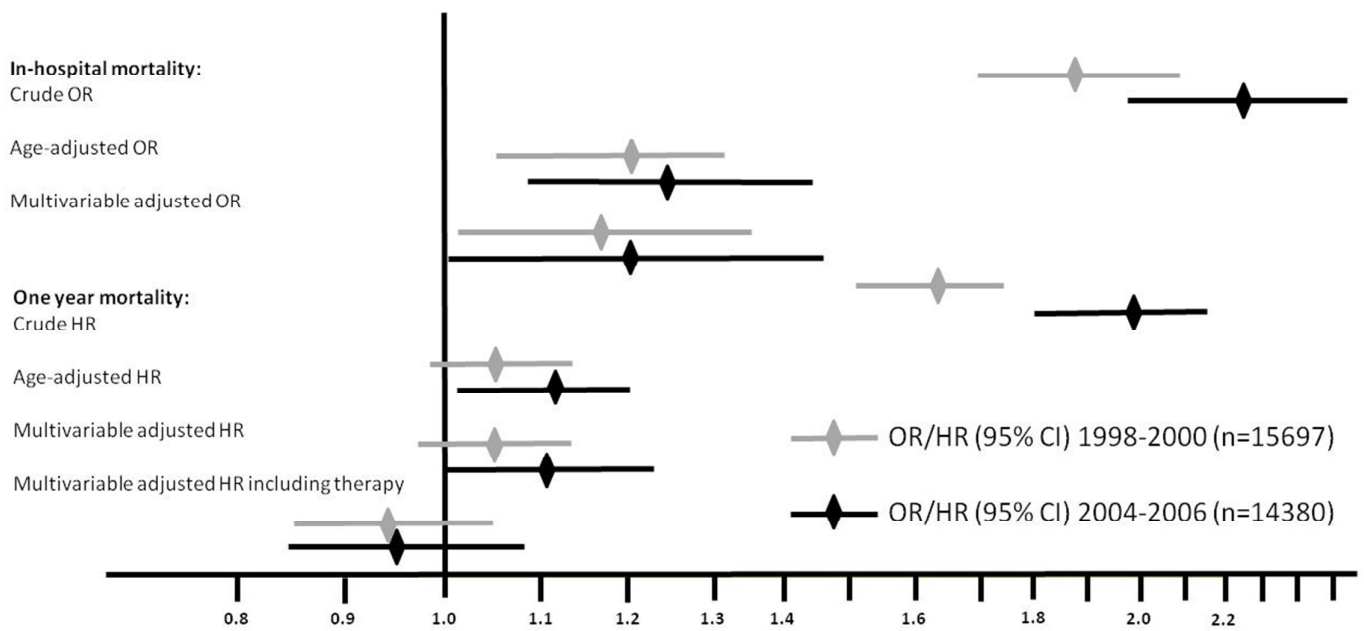

Peer review only
